# Supplementary material for: Prediction of influenza A virus-human protein-protein interactions using XGBoost with continuous and discontinuous amino acids information
Source: PeerJ. 2025 Jan 30;13:e18863. doi: 10.7717/peerj.18863 (PMC11787804; doi:10.7717/peerj.18863)
Supplement: Supplemental Information 1 [file peerj-13-18863-s001.xlsx]

## Sheet: Sheet1
Model	Parameters	Parameter search space
XGBoost	n_estimators=310 learning_rate=0.1 max_depth=7 min_child_weight=1 gamma=0.0 reg_alpha=0 reg_lambda=1	list(np.arange(50, 500, 10)) list(np.arange(0.01, 0.2, 0.01)) list(np.arange(3, 10, 1)) list(np.arange(1, 10, 1)) list(np.arange(0.0, 0.3, 0.1)) list(np.arange(0.0, 1, 0.1)) list(np.arange(0.0, 1, 0.1))
Random Forest	n_estimators=100 max_depth=None min_samples_split=2 min_samples_leaf=1 max_features='sqrt' criterion='gini'	list(np.arange(50, 500, 10)) [None, 2, 4, 6, 8, 10] list(np.arange(2, 10, 1)) list(np.arange(1, 10, 1)) ['sqrt', 'log2'] ['gini', 'entropy']
ExtraTrees	n_estimators=310 criterion='gini' max_depth=None min_samples_split=2 min_samples_leaf=1 max_features='sqrt'	list(np.arange(50, 500, 10)) ['gini', 'entropy'] [None, 2, 4, 6, 8, 10] list(np.arange(2, 10, 1)) list(np.arange(1, 10, 1)) ['sqrt', 'log2']
AdaBoost	n_estimators=310 learning_rate=0.1 algorithm='SAMME.R'	list(np.arange(50, 500, 10)) list(np.arange(0.01, 0.2, 0.01))['SAMME', 'SAMME.R']
SVM	C=100 gamma=0.01 kernel='rbf'	[0.1, 1, 10, 100, 200] [0.01, 0.1, 1, 5, 10, 50, 100] ['linear', 'rbf', 'poly']
KNN	n_estimators=2	list(np.arange(1, 20, 1))
LR	C=6 penalty='l2'	list(np.arange(0, 100, 1)) ['l1', 'l2']
