# Supplementary material for: Prediction of influenza A virus-human protein-protein interactions using XGBoost with continuous and discontinuous amino acids information
Source: PeerJ. 2025 Jan 30;13:e18863. doi: 10.7717/peerj.18863 (PMC11787804; doi:10.7717/peerj.18863)
Supplement: Supplemental Information 2 [file peerj-13-18863-s002.xlsx]

## Sheet: 0.95-0.5H-V-PPI
H	V	Group
Q969G3	HA	HA
Q96GX2	HA	HA
Q6ZMM2	HA	HA
P61604	HA	HA
P23297	HA	HA
O43822	HA	HA
Q9H501	HA	HA
Q8TCD5	HA	HA
O14949	HA	HA
Q92922	HA	HA
P17174	HA	HA
P81534	HA	HA
Q7Z4W1	HA	HA
Q9Y2V7	HA	HA
Q9NVP1	HA	HA
O43617	HA	HA
Q01970	HA	HA
Q6FI13	HA	HA
Q13283	HA	HA
P61289	HA	HA
Q12756	HA	HA
Q16658	HA	HA
P55808	HA	HA
Q13895	HA	HA
P55884	HA	HA
Q8IWT1	HA	HA
O95347	HA	HA
Q8N5Z5	HA	HA
Q92748	HA	HA
O95817	HA	HA
Q00577	HA	HA
P01148	HA	HA
Q9BYQ5	HA	HA
P52209	HA	HA
Q92598	HA	HA
P26641	HA	HA
Q9BVM4	HA	HA
Q9BRP4	HA	HA
Q96KN1	HA	HA
Q9Y3I0	HA	HA
Q92629	HA	HA
O15553	HA	HA
Q86VB7	HA	HA
Q9NU02	HA	HA
A8MQ03	HA	HA
P07148	HA	HA
P80297	HA	HA
Q9BWG6	HA	HA
P14618	HA	HA
Q7RTU7	HA	HA
P12004	HA	HA
P01270	HA	HA
Q14764	HA	HA
Q14444	HA	HA
P09038	HA	HA
P48444	HA	HA
A6PVI3	HA	HA
Q96GI7	HA	HA
Q99962	HA	HA
Q9BWP8	HA	HA
P26885	HA	HA
Q86VF2	HA	HA
Q96BD6	HA	HA
Q0ZGT2	HA	HA
O60547	HA	HA
Q8IXQ3	HA	HA
O14776	HA	HA
O14994	HA	HA
P60510	HA	HA
P61204	HA	HA
Q5QNW6	HA	HA
Q15493	HA	HA
Q8TF09	HA	HA
Q9P243	HA	HA
P60983	HA	HA
P62166	HA	HA
P35080	HA	HA
Q6ZMN8	HA	HA
Q15004	HA	HA
O95619	HA	HA
Q8WUM0	HA	HA
Q8IUR0	HA	HA
Q99615	HA	HA
O00330	HA	HA
Q6IN84	HA	HA
P09629	HA	HA
Q8IYN2	HA	HA
Q56P42	HA	HA
P61296	HA	HA
Q9Y324	HA	HA
Q13523	HA	HA
Q99865	HA	HA
Q92688	HA	HA
Q8NHW3	HA	HA
P12035	HA	HA
Q8WUU5	HA	HA
P69905	HA	HA
O76038	HA	HA
Q9Y4L1	HA	HA
Q8WXG8	HA	HA
Q92997	HA	HA
Q13319	HA	HA
P41208	HA	HA
Q9H322	HA	HA
O95793	HA	HA
Q8TBB1	HA	HA
Q9ULB1	HA	HA
Q75WM6	HA	HA
O00548	HA	HA
O14979	HA	HA
O95847	HA	HA
Q5VYV7	HA	HA
P37198	HA	HA
O75475	HA	HA
A0A0U1RRK4	HA	HA
P53816	HA	HA
O60499	HA	HA
P02461	HA	HA
P48668	HA	HA
Q6PI98	HA	HA
P62995	HA	HA
P48788	HA	HA
Q99715	HA	HA
Q7Z2F6	HA	HA
P52434	HA	HA
P45985	HA	HA
Q5TCM9	HA	HA
P49321	HA	HA
Q16543	HA	HA
P09455	HA	HA
O00267	HA	HA
O95391	HA	HA
P28356	HA	HA
Q92896	HA	HA
P46821	HA	HA
Q9BY41	HA	HA
Q96S95	HA	HA
P40429	HA	HA
Q99909	HA	HA
Q9NQZ2	HA	HA
O00268	HA	HA
Q9NRX4	HA	HA
Q9H6W3	HA	HA
P02810	HA	HA
P41279	HA	HA
P46783	HA	HA
Q5T5S1	HA	HA
Q15349	HA	HA
Q92900	HA	HA
Q15170	HA	HA
Q6PKG0	HA	HA
Q14847	HA	HA
O43390	HA	HA
P62913	HA	HA
Q9C098	HA	HA
Q9NRX3	HA	HA
Q9BQ66	HA	HA
O75526	HA	HA
Q9BRJ6	HA	HA
Q16626	HA	HA
Q8NEG2	HA	HA
P63211	HA	HA
Q9H5X1	HA	HA
Q5MJ10	HA	HA
P23025	HA	HA
Q5T7P2	HA	HA
Q9NP95	HA	HA
Q92777	HA	HA
Q7L273	HA	HA
Q00610	HA	HA
O75487	HA	HA
P11413	HA	HA
Q86VQ3	HA	HA
P42771	HA	HA
Q9H1R3	HA	HA
P62072	HA	HA
Q5JUX0	HA	HA
O15523	HA	HA
P12109	HA	HA
P02008	HA	HA
Q9UM54	HA	HA
Q96G21	HA	HA
Q8NAA4	HA	HA
O15020	HA	HA
Q05707	HA	HA
Q9UK32	HA	HA
Q86T20	HA	HA
Q14117	HA	HA
Q9UQ35	HA	HA
Q5VZ52	HA	HA
P06454	HA	HA
P40425	HA	HA
Q8IV56	HA	HA
Q9Y536	HA	HA
Q53H12	HA	HA
Q9GZY4	HA	HA
P49840	HA	HA
O95782	HA	HA
Q9UBR1	HA	HA
O75525	HA	HA
P63151	HA	HA
Q9NQ89	HA	HA
O75348	HA	HA
H3BPM6	HA	HA
O00232	HA	HA
P09382	HA	HA
P35221	HA	HA
Q15651	HA	HA
Q9Y680	HA	HA
Q15056	HA	HA
O15117	HA	HA
Q9H7B2	HA	HA
Q9H9T3	HA	HA
Q9Y303	HA	HA
P46781	HA	HA
Q3SXZ7	HA	HA
P02458	HA	HA
Q6ZMQ8	HA	HA
Q16204	HA	HA
Q96MF7	HA	HA
P63261	HA	HA
Q6P1J9	HA	HA
Q6P2I7	HA	HA
P83916	HA	HA
P82970	HA	HA
Q5H9R7	HA	HA
P30154	HA	HA
O15066	HA	HA
Q8WYQ3	HA	HA
Q7L0Q8	HA	HA
Q6PD62	HA	HA
Q8NB37	HA	HA
O14561	HA	HA
Q8NAV2	HA	HA
Q13882	HA	HA
Q9NUV7	HA	HA
Q5JSH3	HA	HA
Q86UW2	HA	HA
P23528	HA	HA
Q8IZU1	HA	HA
A6NC42	HA	HA
Q96CB8	HA	HA
P0DJI9	HA	HA
Q14681	HA	HA
O95219	HA	HA
Q13627	HA	HA
P13861	HA	HA
Q15050	HA	HA
P52292	HA	HA
Q16799	HA	HA
Q8NFJ8	HA	HA
P53041	HA	HA
P11086	HA	HA
O15355	HA	HA
Q504U0	HA	HA
P18583	HA	HA
Q9H8M2	HA	HA
P07738	HA	HA
P36542	HA	HA
P23396	HA	HA
Q9Y543	HA	HA
Q63HQ0	HA	HA
Q96QC0	HA	HA
Q15746	HA	HA
Q02575	HA	HA
P60896	HA	HA
P18124	HA	HA
Q9H320	HA	HA
P31415	HA	HA
Q06587	HA	HA
Q5VTT5	HA	HA
Q9UN19	HA	HA
Q49A26	HA	HA
Q9C0B5	HA	HA
Q3LI58	HA	HA
P47224	HA	HA
Q9H2C1	HA	HA
Q8WTQ1	HA	HA
Q96AH0	HA	HA
P59282	HA	HA
P15421	HA	HA
Q8N4E4	HA	HA
Q9Y5N5	HA	HA
O43615	HA	HA
Q2TAL6	HA	HA
Q3ZCM7	HA	HA
P04280	HA	HA
A6NED2	HA	HA
P21796	HA	HA
Q01082	HA	HA
Q9Y4C8	HA	HA
Q5FWF7	HA	HA
O43399	HA	HA
Q9UHA4	HA	HA
O43543	HA	HA
Q01130	HA	HA
Q13765	HA	HA
Q9NQE9	HA	HA
Q9HAP6	HA	HA
Q9BR01	HA	HA
O00629	HA	HA
O75973	HA	HA
Q86VW2	HA	HA
P62910	HA	HA
Q14320	HA	HA
Q99571	HA	HA
P98171	HA	HA
Q7Z5K2	HA	HA
O96028	HA	HA
P45379	HA	HA
O60925	HA	HA
P00374	HA	HA
P60323	HA	HA
P08621	HA	HA
Q93077	HA	HA
Q9H147	HA	HA
Q9BQ39	HA	HA
P57053	HA	HA
Q8IUE6	HA	HA
A6NEL2	HA	HA
P14927	HA	HA
O95466	HA	HA
Q9Y3L5	HA	HA
O75175	HA	HA
Q9UBS4	HA	HA
Q9Y2D0	HA	HA
Q8TBB0	HA	HA
Q96JG8	HA	HA
P27635	HA	HA
O75190	HA	HA
Q5T5X7	HA	HA
Q9H078	HA	HA
Q5H9L2	HA	HA
Q86VY4	HA	HA
O00308	HA	HA
P68366	HA	HA
Q9Y6X0	HA	HA
Q5TCZ1	HA	HA
Q5MNZ6	HA	HA
P33764	HA	HA
Q9UFB7	HA	HA
Q15007	HA	HA
Q9H2G4	HA	HA
O00148	HA	HA
P02042	HA	HA
Q9Y4K0	HA	HA
P18615	HA	HA
Q9BT67	HA	HA
Q9BWW7	HA	HA
Q9P2J5	HA	HA
P42127	HA	HA
P01591	HA	HA
P61081	HA	HA
Q7Z5V6	HA	HA
P78348	HA	HA
A0A183	HA	HA
P67870	HA	HA
Q5TYM5	HA	HA
A0A096LP55	HA	HA
O00487	HA	HA
Q13263	HA	HA
Q5JXX7	HA	HA
P62316	HA	HA
P0C0S8	HA	HA
Q9P2R3	HA	HA
P01160	HA	HA
Q9P015	HA	HA
P78545	HA	HA
O94874	HA	HA
P24723	HA	HA
P63173	HA	HA
P68032	HA	HA
Q9H910	HA	HA
O75150	HA	HA
Q99848	HA	HA
Q7L014	HA	HA
Q4LDG9	HA	HA
Q14993	HA	HA
Q9Y600	HA	HA
P14649	HA	HA
Q15020	HA	HA
Q53EL6	HA	HA
O00481	HA	HA
Q15545	HA	HA
O75817	HA	HA
Q9NYY1	HA	HA
P05455	HA	HA
Q96LK0	HA	HA
Q93079	HA	HA
Q13685	HA	HA
Q99217	HA	HA
Q96D98	HA	HA
Q9BRX9	HA	HA
Q16890	HA	HA
O75828	HA	HA
O43865	HA	HA
P30793	HA	HA
Q6PGP7	HA	HA
P38117	HA	HA
Q8WUJ1	HA	HA
P27216	HA	HA
O95622	HA	HA
P62899	HA	HA
Q9ULE3	HA	HA
Q9H461	HA	HA
P11488	HA	HA
Q12934	HA	HA
P0C862	HA	HA
Q8N371	HA	HA
Q8N9W5	HA	HA
P01040	HA	HA
Q9Y576	HA	HA
Q6UX40	HA	HA
Q9Y4Y9	HA	HA
Q96EH3	HA	HA
Q9HDC9	HA	HA
P11498	HA	HA
Q96CM4	HA	HA
Q9BYD6	HA	HA
P51114	HA	HA
Q6ZV29	HA	HA
Q0PNE2	HA	HA
O15235	HA	HA
P82909	HA	HA
P15259	HA	HA
Q96HE8	HA	HA
Q7L311	HA	HA
Q00597	HA	HA
P25788	HA	HA
Q9BRU2	HA	HA
Q9BR39	HA	HA
O43707	HA	HA
Q8NE63	HA	HA
P52597	HA	HA
P16403	HA	HA
Q8NG41	HA	HA
Q9H336	HA	HA
P09651	HA	HA
Q01081	HA	HA
Q9Y247	HA	HA
Q00325	HA	HA
Q96A05	HA	HA
P09467	HA	HA
Q86UY6	HA	HA
Q96A57	HA	HA
Q96MP8	HA	HA
P00568	HA	HA
Q8TD35	HA	HA
P08865	HA	HA
O95715	HA	HA
Q6P5X5	HA	HA
Q5U5X0	HA	HA
Q96MN5	HA	HA
P04083	HA	HA
Q495X7	HA	HA
Q9P2T0	HA	HA
Q9NQG5	HA	HA
P00367	HA	HA
Q99963	HA	HA
Q07021	HA	HA
Q13200	HA	HA
P08754	HA	HA
Q09666	HA	HA
Q96D15	HA	HA
Q86Z23	HA	HA
O15034	HA	HA
Q96P70	HA	HA
P30101	HA	HA
P05156	HA	HA
Q66PJ3	HA	HA
Q9BUH8	HA	HA
Q8N257	HA	HA
Q96H35	HA	HA
Q7Z569	HA	HA
Q7Z3Z0	HA	HA
A7E2Y1	HA	HA
Q8WTS6	HA	HA
Q96NB3	HA	HA
O14633	HA	HA
Q6P161	HA	HA
B2RUZ4	HA	HA
Q8N841	HA	HA
Q14151	HA	HA
P41271	HA	HA
P20671	HA	HA
Q13242	HA	HA
P49406	HA	HA
Q8NBT0	HA	HA
P19367	HA	HA
Q4KMP7	HA	HA
O94964	HA	HA
P17096	HA	HA
C9J069	HA	HA
Q9P299	HA	HA
P61247	HA	HA
Q9NRC6	HA	HA
P36639	HA	HA
Q9Y6N6	HA	HA
Q7Z6I8	HA	HA
Q9BWT1	HA	HA
A8MTJ3	HA	HA
A0A087WWA1	HA	HA
P78536	HA	HA
P00709	HA	HA
P00558	HA	HA
Q6ZMW3	HA	HA
P08572	HA	HA
Q9Y2Q5	HA	HA
Q9BYE2	HA	HA
P32754	HA	HA
Q96AG4	HA	HA
Q9BTT0	HA	HA
Q8N9N8	HA	HA
Q5T752	HA	HA
Q13155	HA	HA
O75531	HA	HA
Q9BRK5	HA	HA
O75940	HA	HA
Q9UBC3	HA	HA
P05388	HA	HA
Q9Y3Q8	HA	HA
O75935	HA	HA
P12107	HA	HA
P78527	HA	HA
Q9HD42	HA	HA
Q96I13	HA	HA
P47897	HA	HA
Q9H9Q2	HA	HA
Q9HAB8	HA	HA
Q96L21	HA	HA
Q5HY64	HA	HA
Q9NRH2	HA	HA
Q9BWF3	HA	HA
Q5GH76	HA	HA
P68363	HA	HA
P14317	HA	HA
P11226	HA	HA
Q9Y4B5	HA	HA
Q9UBF6	HA	HA
Q9BQE3	HA	HA
P10916	HA	HA
P28070	HA	HA
O60645	HA	HA
Q9BSK4	HA	HA
Q8NCB2	HA	HA
Q00839	HA	HA
P00915	HA	HA
Q96B26	HA	HA
P25686	HA	HA
Q5EE01	HA	HA
P68104	HA	HA
A0A087WXM9	HA	HA
Q8N8J7	HA	HA
Q9UKD2	HA	HA
Q99879	HA	HA
P23588	HA	HA
P62875	HA	HA
Q6DN14	HA	HA
Q9BZX4	HA	HA
P35612	HA	HA
Q6EEV4	HA	HA
P46782	HA	HA
Q15554	HA	HA
Q6IBS0	HA	HA
Q86VF7	HA	HA
Q9UKS6	HA	HA
Q14657	HA	HA
Q9P2L0	HA	HA
Q15051	HA	HA
P30086	HA	HA
Q9UPM9	HA	HA
Q8TBF4	HA	HA
Q8WXF1	HA	HA
Q93088	HA	HA
Q9BUF5	HA	HA
P62937	HA	HA
O15182	HA	HA
Q96EY8	HA	HA
Q96HR3	HA	HA
P05937	HA	HA
P84243	HA	HA
P49368	HA	HA
Q9Y483	HA	HA
O95455	HA	HA
P55769	HA	HA
Q9UPT8	HA	HA
P47929	HA	HA
B3EWG3	HA	HA
Q9NZ56	HA	HA
O96013	HA	HA
Q8WVI0	HA	HA
Q6JVE9	HA	HA
Q8TBK6	HA	HA
P10155	HA	HA
Q6ZTZ1	HA	HA
P62701	HA	HA
O60704	HA	HA
O75688	HA	HA
P28562	HA	HA
A5D8V6	HA	HA
P30050	HA	HA
Q6UWP8	HA	HA
O43677	HA	HA
Q4ZIN3	HA	HA
Q9UGB7	HA	HA
Q53GS9	HA	HA
O43598	HA	HA
Q13588	HA	HA
P62269	HA	HA
P18825	HA	HA
O14775	HA	HA
Q9BSF8	HA	HA
Q0Z7S8	HA	HA
Q9Y2X3	HA	HA
Q16878	HA	HA
P52739	HA	HA
Q5TA81	HA	HA
Q99549	HA	HA
Q9Y2G4	HA	HA
O75909	HA	HA
O15525	HA	HA
Q8WXK4	HA	HA
O15213	HA	HA
P07384	HA	HA
Q8IY51	HA	HA
Q6P1M3	HA	HA
Q9HBB8	HA	HA
Q9H3G5	HA	HA
Q14554	HA	HA
A1YPR0	HA	HA
P09683	HA	HA
Q6P6B7	HA	HA
Q9NS73	HA	HA
Q8N6M8	HA	HA
P49763	HA	HA
Q9GZV1	HA	HA
P27694	HA	HA
Q969S3	HA	HA
Q99525	HA	HA
Q92478	HA	HA
P51970	HA	HA
Q9BW30	HA	HA
Q99439	HA	HA
O96015	HA	HA
Q6EEV6	HA	HA
Q9Y285	HA	HA
Q8N140	HA	HA
O95218	HA	HA
Q8N5P1	HA	HA
Q12905	HA	HA
Q8N6N2	HA	HA
Q6P3W2	HA	HA
Q96PY6	HA	HA
Q96LB4	HA	HA
Q8NHY5	HA	HA
P42768	HA	HA
Q9BXY4	HA	HA
Q99653	HA	HA
Q5KU26	HA	HA
O15269	HA	HA
Q99729	HA	HA
P22392	HA	HA
Q9BXJ4	HA	HA
Q9NS28	HA	HA
Q96CN5	HA	HA
Q8IUD6	HA	HA
Q99457	HA	HA
A2RU49	HA	HA
Q96F05	HA	HA
Q9NPQ8	HA	HA
P30085	HA	HA
Q9BZD6	HA	HA
O96004	HA	HA
P58294	HA	HA
Q6SPF0	HA	HA
P58753	HA	HA
Q5JTZ5	HA	HA
Q9H902	HA	HA
Q9H0R4	HA	HA
Q8WU10	HA	HA
Q9BUA6	HA	HA
Q9BY42	HA	HA
P62258	HA	HA
Q9UKJ3	HA	HA
Q9BTM1	HA	HA
Q9H0L4	HA	HA
Q5JSQ8	HA	HA
A8MT69	HA	HA
Q15485	HA	HA
P61163	HA	HA
Q4W5G0	HA	HA
Q9UQ80	HA	HA
Q15027	HA	HA
P07355	HA	HA
O95873	HA	HA
Q8N9C0	HA	HA
Q9Y2S6	HA	HA
Q6P582	HA	HA
Q70HW3	HA	HA
Q8WW22	HA	HA
P0DJI8	HA	HA
Q9Y224	HA	HA
Q8IZS6	HA	HA
Q08945	HA	HA
Q13185	HA	HA
Q5T200	HA	HA
P63104	HA	HA
Q9Y315	HA	HA
Q9P0M9	HA	HA
Q9BQC6	HA	HA
Q5TC84	HA	HA
Q9NX24	HA	HA
Q8N427	HA	HA
O75638	HA	HA
A6NJ08	HA	HA
O14950	HA	HA
Q15063	HA	HA
O00425	HA	HA
Q9Y675	HA	HA
P45973	HA	HA
Q9BVC4	HA	HA
Q9Y3A2	HA	HA
P49411	HA	HA
Q9Y3D5	HA	HA
P57055	HA	HA
O95257	HA	HA
Q8N442	HA	HA
Q8TAP4	HA	HA
Q9H115	HA	HA
Q6VMQ6	HA	HA
O43189	HA	HA
P05121	HA	HA
P23526	HA	HA
Q9BSH4	HA	HA
Q8NEG4	HA	HA
P31947	HA	HA
P23246	HA	HA
O60882	HA	HA
Q96DE5	HA	HA
Q5T013	HA	HA
Q03188	HA	HA
P62244	HA	HA
P11233	HA	HA
Q96A33	HA	HA
P49748	HA	HA
Q96FZ7	HA	HA
O15145	HA	HA
Q8NFZ5	HA	HA
O75947	HA	HA
P83876	HA	HA
Q9Y6A4	HA	HA
Q12837	HA	HA
Q8WUR7	HA	HA
P09543	HA	HA
Q9UQ10	HA	HA
Q9BV29	HA	HA
P20472	HA	HA
P62314	HA	HA
O60888	HA	HA
Q96L33	HA	HA
P09661	HA	HA
Q7Z406	HA	HA
Q96QH2	HA	HA
Q96PY5	HA	HA
Q9HAU5	HA	HA
A6NGE4	HA	HA
Q9HD15	HA	HA
Q5TBB1	HA	HA
Q96CF2	HA	HA
P49746	HA	HA
Q9NXW2	HA	HA
Q96SI1	HA	HA
Q9NZQ0	HA	HA
Q15599	HA	HA
Q9NYQ8	HA	HA
Q9Y284	HA	HA
Q6ZMI3	HA	HA
P11217	HA	HA
O95573	HA	HA
P02747	HA	HA
P09871	HA	HA
Q07654	HA	HA
Q96BR5	HA	HA
O75569	HA	HA
Q9BZ23	HA	HA
Q8IVT2	HA	HA
Q15560	HA	HA
O43896	HA	HA
Q14258	HA	HA
Q15287	HA	HA
Q8IYK2	HA	HA
A6NMA1	HA	HA
P52435	HA	HA
Q15833	HA	HA
Q06787	HA	HA
Q32MZ4	HA	HA
Q14974	HA	HA
Q15717	HA	HA
Q969V5	HA	HA
Q8N9V2	HA	HA
O00194	HA	HA
P26583	HA	HA
P05997	HA	HA
P05141	HA	HA
Q9NZR1	HA	HA
P07197	HA	HA
Q96IX5	HA	HA
P38159	HA	HA
Q01955	HA	HA
Q8NDF8	HA	HA
P08133	HA	HA
Q9UBT2	HA	HA
Q5SXM2	HA	HA
Q9Y3P9	HA	HA
Q9P2K5	HA	HA
Q15366	HA	HA
O75400	HA	HA
Q96PK6	HA	HA
Q9P2M1	HA	HA
Q7Z7B7	HA	HA
Q7Z7H5	HA	HA
P62820	HA	HA
O43639	HA	HA
Q92804	HA	HA
P52756	HA	HA
O75553	HA	HA
Q9NVT9	HA	HA
P0CW27	HA	HA
Q15208	HA	HA
P78330	HA	HA
P07996	HA	HA
Q3LI72	HA	HA
Q9UMD9	HA	HA
P82664	HA	HA
P14866	HA	HA
Q02880	HA	HA
Q9NZI6	HA	HA
P07437	HA	HA
Q96SB4	HA	HA
Q96P50	HA	HA
P19784	HA	HA
Q9Y5S9	HA	HA
O95825	HA	HA
P42766	HA	HA
Q9UBB5	HA	HA
O00294	HA	HA
Q96FV3	HA	HA
A6NF83	HA	HA
P0CG32	HA	HA
P49756	HA	HA
Q93062	HA	HA
P12235	HA	HA
Q9Y3D6	HA	HA
Q14324	HA	HA
Q9BRU9	HA	HA
P13646	HA	HA
Q68J44	HA	HA
P10636	HA	HA
P62854	HA	HA
P49207	HA	HA
Q9H1Z4	HA	HA
Q9BXK5	HA	HA
P60866	HA	HA
Q12800	HA	HA
Q9H1D9	HA	HA
Q96IZ0	HA	HA
Q14152	HA	HA
Q53LP3	HA	HA
Q9GZN8	HA	HA
O60841	HA	HA
Q92526	HA	HA
Q7Z5Y7	HA	HA
P43034	HA	HA
P08590	HA	HA
Q15269	HA	HA
Q9UKL6	HA	HA
Q9Y3Y2	HA	HA
Q96A70	HA	HA
Q96K21	HA	HA
Q9NR45	HA	HA
Q99442	HA	HA
P15313	HA	HA
P43405	HA	HA
Q8TCA0	HA	HA
A8MXD5	HA	HA
Q00872	HA	HA
Q8NBJ7	HA	HA
P27540	HA	HA
O43324	HA	HA
P08833	HA	HA
Q8NFW1	HA	HA
Q9Y5K8	HA	HA
Q00341	HA	HA
Q01546	HA	HA
P58546	HA	HA
Q7Z429	HA	HA
Q12830	HA	HA
Q9BQA1	HA	HA
P17936	HA	HA
Q8NHU0	HA	HA
P18085	HA	HA
P07237	HA	HA
Q9H246	HA	HA
Q99417	HA	HA
Q15084	HA	HA
Q9P2R7	HA	HA
Q8WUD4	HA	HA
Q6ZN18	HA	HA
O75037	HA	HA
Q9UIF7	HA	HA
P62987	HA	HA
P56182	HA	HA
P56279	HA	HA
Q9NXJ5	HA	HA
P49448	HA	HA
O15090	HA	HA
Q9NYB9	HA	HA
O95402	HA	HA
Q9Y265	HA	HA
P25789	HA	HA
Q9NX01	HA	HA
Q08AG7	HA	HA
P32418	HA	HA
P03956	HA	HA
Q99453	HA	HA
Q8TCB7	HA	HA
O43768	HA	HA
Q5T481	HA	HA
Q5VSR9	HA	HA
P62877	HA	HA
Q8WWF8	HA	HA
Q9H9B1	HA	HA
Q96MS3	HA	HA
Q8WVI7	HA	HA
Q02325	HA	HA
P33240	HA	HA
Q9C002	HA	HA
O15372	HA	HA
Q6UWT4	HA	HA
O43820	HA	HA
O60503	HA	HA
Q15046	HA	HA
P49918	HA	HA
Q0VAF6	HA	HA
Q9BYR4	HA	HA
O15370	HA	HA
Q9NUQ6	HA	HA
Q9H074	HA	HA
Q15542	HA	HA
P02533	HA	HA
Q05823	HA	HA
Q8TC84	HA	HA
P07900	HA	HA
A0PJW8	HA	HA
Q8IZP7	HA	HA
P78346	HA	HA
Q9UHP6	HA	HA
O94905	HA	HA
P83369	HA	HA
Q9H765	HA	HA
P52788	HA	HA
P60842	HA	HA
Q02978	HA	HA
Q5JTN6	HA	HA
O14926	HA	HA
Q96DC9	HA	HA
O60506	HA	HA
Q92838	HA	HA
O95167	HA	HA
P82650	HA	HA
P55055	HA	HA
P16220	HA	HA
P08708	HA	HA
Q99832	HA	HA
Q96PE5	HA	HA
P21333	HA	HA
Q02790	HA	HA
P27348	HA	HA
Q9UNX3	HA	HA
Q96IZ7	HA	HA
Q9H772	HA	HA
P24593	HA	HA
P13647	HA	HA
P08254	HA	HA
Q8IZC6	HA	HA
P62906	HA	HA
O75052	HA	HA
Q9P0J1	HA	HA
Q9P242	HA	HA
Q9Y2T3	HA	HA
Q96A72	HA	HA
Q2UY09	HA	HA
Q8N5C6	HA	HA
Q5BKY1	HA	HA
Q96QS6	HA	HA
Q9BZL4	HA	HA
Q9NWY4	HA	HA
O43395	HA	HA
Q7L775	HA	HA
P39060	HA	HA
Q14004	HA	HA
Q9BQ04	HA	HA
Q8WU39	HA	HA
Q86VZ2	HA	HA
O00401	HA	HA
Q99714	HA	HA
P82914	HA	HA
Q86XW9	HA	HA
P18858	HA	HA
Q3LI54	HA	HA
Q9BXA6	HA	HA
O14977	HA	HA
Q8N5W8	HA	HA
Q9Y657	HA	HA
O43747	HA	HA
Q99877	HA	HA
Q9NQM4	HA	HA
Q14028	HA	HA
Q9BY77	HA	HA
Q6NUK4	HA	HA
P16870	HA	HA
Q8WXE0	HA	HA
P04908	HA	HA
Q9HD47	HA	HA
Q9Y4F5	HA	HA
Q15005	HA	HA
P10114	HA	HA
P20700	HA	HA
P62805	HA	HA
Q96EF6	HA	HA
Q12931	HA	HA
P12268	HA	HA
Q9Y5P8	HA	HA
Q9Y421	HA	HA
Q9Y6M1	HA	HA
P02686	HA	HA
Q13823	HA	HA
Q9HAY2	HA	HA
P07766	HA	HA
Q07283	HA	HA
P20264	HA	HA
Q99218	HA	HA
Q7Z7F7	HA	HA
P31948	HA	HA
P20849	HA	HA
P30405	HA	HA
Q9Y4P3	HA	HA
Q5HYN5	HA	HA
Q9Y3E2	HA	HA
P08195	HA	HA
P55265	HA	HA
Q9BV20	HA	HA
Q5TAT6	HA	HA
P00918	HA	HA
Q8TDM0	HA	HA
P49959	HA	HA
P62873	HA	HA
Q8WWF1	HA	HA
Q3YBR2	HA	HA
P16520	HA	HA
P62714	HA	HA
Q86SG2	HA	HA
P62266	HA	HA
P42696	HA	HA
O75409	HA	HA
Q8IWX7	HA	HA
O00505	HA	HA
Q96BP2	HA	HA
P23919	HA	HA
P25815	HA	HA
O95848	HA	HA
P55075	HA	HA
P05387	HA	HA
O14904	HA	HA
Q9BUB7	HA	HA
P59780	HA	HA
O00470	HA	HA
O75152	HA	HA
Q71UM5	HA	HA
P25705	HA	HA
Q96NG3	HA	HA
Q6S545	HA	HA
P08123	HA	HA
Q14257	HA	HA
P08913	HA	HA
P16401	HA	HA
P30519	HA	HA
Q14318	HA	HA
P53420	HA	HA
Q9NWM8	HA	HA
Q96BZ8	HA	HA
Q9Y6Z7	HA	HA
Q702N8	HA	HA
Q96RP9	HA	HA
Q8N9T8	HA	HA
O15061	HA	HA
P11229	HA	HA
Q86SX6	HA	HA
P17987	HA	HA
P01189	HA	HA
Q96FA3	HA	HA
Q13371	HA	HA
P47756	HA	HA
Q9UFN0	HA	HA
Q9C010	HA	HA
Q9UPV7	HA	HA
Q14019	HA	HA
Q9H008	HA	HA
Q9BQG0	HA	HA
Q6UWS5	HA	HA
P35908	HA	HA
Q9NTI5	HA	HA
O75689	HA	HA
Q14315	HA	HA
Q9UHG0	HA	HA
Q96I25	HA	HA
Q5T9A4	HA	HA
Q6IAA8	HA	HA
Q14896	HA	HA
Q8IUH3	HA	HA
Q9UEW3	HA	HA
Q92665	HA	HA
P31689	HA	HA
P17980	HA	HA
Q9Y3B1	HA	HA
Q8NFW8	HA	HA
P61019	HA	HA
Q9UJU6	HA	HA
P23527	HA	HA
P61026	HA	HA
Q9C0J8	HA	HA
P78358	HA	HA
Q8TDN2	HA	HA
P43166	HA	HA
Q70IA8	HA	HA
Q96FK6	HA	HA
Q9GZT3	HA	HA
O43143	HA	HA
Q01449	HA	HA
P51858	HA	HA
O14602	HA	HA
P63267	HA	HA
Q562R1	HA	HA
Q9H4A6	HA	HA
Q8WYH8	HA	HA
P62750	HA	HA
Q9NY12	HA	HA
Q8NAA5	HA	HA
Q7Z6J9	HA	HA
A6NNE9	HA	HA
Q6UWM5	HA	HA
P04156	HA	HA
Q03828	HA	HA
P54922	HA	HA
Q7L0Y3	HA	HA
P57076	HA	HA
Q09028	HA	HA
O95834	HA	HA
Q15397	HA	HA
Q8NCR3	HA	HA
P08779	HA	HA
Q8NA70	HA	HA
P15248	HA	HA
P09430	HA	HA
Q8N983	HA	HA
Q9Y2L9	HA	HA
Q5TGZ0	HA	HA
Q9NU23	HA	HA
Q9H840	HA	HA
P81277	HA	HA
Q9HBH0	HA	HA
Q7Z7J9	HA	HA
Q9UJX6	HA	HA
Q9H0U4	HA	HA
Q9UHF5	HA	HA
P62857	HA	HA
Q86X29	HA	HA
Q9NY93	HA	HA
Q9BZL1	HA	HA
Q9Y6N9	HA	HA
O43866	HA	HA
Q9UGY1	HA	HA
Q12906	HA	HA
Q9Y6Q5	HA	HA
Q9UPN7	HA	HA
Q96CD0	HA	HA
Q8N7U7	HA	HA
A0A0U1RQF7	HA	HA
Q08752	HA	HA
P07199	HA	HA
P50914	HA	HA
O75494	HA	HA
P51911	HA	HA
Q99720	HA	HA
Q9H444	HA	HA
Q9Y281	HA	HA
A0A0A6YYL3	HA	HA
O60218	HA	HA
Q9Y3T9	HA	HA
Q9Y6S9	HA	HA
Q9H6H4	HA	HA
Q9UMX5	HA	HA
Q5T753	HA	HA
Q99933	HA	HA
Q7L7L0	HA	HA
P62081	HA	HA
Q8WUQ7	HA	HA
P63208	HA	HA
P17844	HA	HA
P62745	HA	HA
Q96E39	HA	HA
Q5JWF2	HA	HA
Q9UII2	HA	HA
Q9H2M3	HA	HA
Q14498	HA	HA
Q14204	HA	HA
Q9NR00	HA	HA
Q16695	HA	HA
O75937	HA	HA
P25800	HA	HA
Q8TDD1	HA	HA
P17677	HA	HA
O95395	HA	HA
P54296	HA	HA
P16949	HA	HA
O14744	HA	HA
P54136	HA	HA
P20073	HA	HA
Q96L03	HA	HA
Q08379	HA	HA
Q9BPZ2	HA	HA
O75496	HA	HA
Q86U28	HA	HA
P54821	HA	HA
P84090	HA	HA
P13232	HA	HA
Q9BQL6	HA	HA
Q99748	HA	HA
Q96P53	HA	HA
Q8IWZ3	HA	HA
Q6BAA4	HA	HA
Q9UL19	HA	HA
Q9BYN8	HA	HA
P30043	HA	HA
Q99733	HA	HA
P49407	HA	HA
Q9BX51	HA	HA
O00231	HA	HA
P00966	HA	HA
O75874	HA	HA
Q7L4I2	HA	HA
Q92541	HA	HA
P24522	HA	HA
Q5JQF8	HA	HA
P55008	HA	HA
O43583	HA	HA
A4D161	HA	HA
Q02388	HA	HA
P05165	HA	HA
Q9P1Z0	HA	HA
P78352	HA	HA
O96033	HA	HA
P52815	HA	HA
Q8WUB8	HA	HA
P07108	HA	HA
P09669	HA	HA
P35269	HA	HA
Q495B1	HA	HA
O15381	HA	HA
Q8WWM9	HA	HA
Q16384	HA	HA
Q9ULZ3	HA	HA
Q9UNP9	HA	HA
P25786	HA	HA
P13994	HA	HA
P25398	HA	HA
Q8NB90	HA	HA
P61513	HA	HA
P07492	HA	HA
Q5VTL8	HA	HA
Q96GN5	HA	HA
Q6NWY9	HA	HA
Q00653	HA	HA
Q96B54	HA	HA
O75369	HA	HA
Q9Y2W2	HA	HA
Q13794	HA	HA
Q8IY81	HA	HA
Q16186	HA	HA
P14625	HA	HA
Q8NE71	HA	HA
Q9P289	HA	HA
Q49AH0	HA	HA
Q14515	HA	HA
P35998	HA	HA
P0DMQ5	HA	HA
O75264	HA	HA
Q9BZI7	HA	HA
Q9UKK6	HA	HA
Q9UN86	HA	HA
Q9Y3C6	HA	HA
Q16363	HA	HA
P62917	HA	HA
Q8IXM2	HA	HA
Q9NP97	HA	HA
Q6IQ22	HA	HA
P08134	HA	HA
Q6PF06	HA	HA
O76031	HA	HA
O14933	HA	HA
P03923	HA	HA
Q96CT7	HA	HA
P17858	HA	HA
Q9Y3C5	HA	HA
Q9UG63	HA	HA
Q15637	HA	HA
Q96TC7	HA	HA
Q14088	HA	HA
Q8IVS2	HA	HA
Q8N1G4	HA	HA
P17480	HA	HA
A6NHN0	HA	HA
Q7Z5L4	HA	HA
P78362	HA	HA
P22694	HA	HA
Q52LJ0	HA	HA
Q00688	HA	HA
O75528	HA	HA
Q15696	HA	HA
Q02747	HA	HA
Q9UDY4	HA	HA
Q0P5N6	HA	HA
Q9H269	HA	HA
P39019	HA	HA
O15498	HA	HA
P69892	HA	HA
Q9P0U1	HA	HA
Q9Y3B4	HA	HA
P62195	HA	HA
P02545	HA	HA
Q9BQ48	HA	HA
Q8N6V4	HA	HA
Q06945	HA	HA
H3BQW9	HA	HA
Q9BQG2	HA	HA
Q9Y314	HA	HA
Q9Y4A0	HA	HA
Q5C9Z4	HA	HA
Q9BZ81	HA	HA
Q9BZZ5	HA	HA
Q9Y5H9	HA	HA
Q01844	HA	HA
Q8N7S2	HA	HA
Q8NHQ1	HA	HA
Q71UI9	HA	HA
O43790	HA	HA
P62888	HA	HA
Q5T8P6	HA	HA
Q7L8J4	HA	HA
P53567	HA	HA
Q8TB05	HA	HA
P82979	HA	HA
Q92522	HA	HA
Q92841	HA	HA
P25205	HA	HA
Q9UKB3	HA	HA
P42167	HA	HA
P0CG47	HA	HA
Q2TB90	HA	HA
Q8IZL8	HA	HA
P07910	HA	HA
Q9BQ13	HA	HA
A0A0B4J2F0	HA	HA
Q9BXJ5	HA	HA
Q13813	HA	HA
Q96A59	HA	HA
Q9BZG1	HA	HA
Q9NRP2	HA	HA
Q16777	HA	HA
Q9BQA9	HA	HA
O15056	HA	HA
Q01518	HA	HA
Q9Y3C1	HA	HA
P11801	HA	HA
Q9NQ34	HA	HA
Q96IK1	HA	HA
Q96G74	HA	HA
P60763	HA	HA
Q9Y295	HA	HA
Q96HY6	HA	HA
O15126	HA	HA
Q9BXQ6	HA	HA
Q08170	HA	HA
P09001	HA	HA
Q9NQC1	HA	HA
P23434	HA	HA
O95968	HA	HA
Q9BU68	HA	HA
P32969	HA	HA
P42857	HA	HA
Q96EL3	HA	HA
P27816	HA	HA
P61326	HA	HA
Q5T754	HA	HA
Q9BQ15	HA	HA
Q96J02	HA	HA
A6NGY3	HA	HA
O75533	HA	HA
Q9BZE4	HA	HA
P14923	HA	HA
P23497	HA	HA
P39748	HA	HA
Q8IWY4	HA	HA
Q9Y692	HA	HA
Q8WXS5	HA	HA
P42677	HA	HA
Q96BX8	HA	HA
Q969Q5	HA	HA
Q9BXL6	HA	HA
O94788	HA	HA
P04792	HA	HA
C9J202	HA	HA
P57738	HA	HA
P42025	HA	HA
Q9NTK5	HA	HA
Q6V0I7	HA	HA
Q5T751	HA	HA
Q86TM6	HA	HA
P42285	HA	HA
Q7Z6M4	HA	HA
P06733	HA	HA
O00339	HA	HA
A8MTZ0	HA	HA
P10109	HA	HA
Q6DKI1	HA	HA
Q6P2M8	HA	HA
Q9NTQ9	HA	HA
Q9NRH1	HA	HA
Q8N163	HA	HA
Q96EY7	HA	HA
O95932	HA	HA
Q9H267	HA	HA
Q96K17	HA	HA
O14625	HA	HA
P07451	HA	HA
Q9C0G0	HA	HA
Q99856	HA	HA
Q9UBK9	HA	HA
Q9H5Q4	HA	HA
P56378	HA	HA
Q14390	HA	HA
Q9NQ29	HA	HA
P09471	HA	HA
P60981	HA	HA
P61457	HA	HA
P15090	HA	HA
O00264	HA	HA
Q8NBS9	HA	HA
P09769	HA	HA
P48023	HA	HA
Q03692	HA	HA
P23763	HA	HA
O95433	HA	HA
O15318	HA	HA
P16989	HA	HA
Q9H1J1	HA	HA
Q8N9Z2	HA	HA
Q9UBI9	HA	HA
Q9Y3T6	HA	HA
Q9NWH9	HA	HA
Q96P44	HA	HA
P30048	HA	HA
P56706	HA	HA
Q6NXT6	HA	HA
A6NKN8	HA	HA
Q9BR61	HA	HA
Q9C099	HA	HA
P62249	HA	HA
Q9Y2B9	HA	HA
Q9NUI1	HA	HA
Q5VTH9	HA	HA
P11142	HA	HA
Q86V59	HA	HA
Q86XN8	HA	HA
O75558	HA	HA
Q8TD31	HA	HA
Q8N4Q0	HA	HA
Q14697	HA	HA
P19012	HA	HA
Q3ZCQ3	HA	HA
P62487	HA	HA
Q15907	HA	HA
O60234	HA	HA
O43521	HA	HA
Q9GZV4	HA	HA
Q9BRX8	HA	HA
O60542	HA	HA
Q13516	HA	HA
Q8N328	HA	HA
Q9BRD0	HA	HA
P29692	HA	HA
Q8IWS0	HA	HA
Q02539	HA	HA
Q9NWU2	HA	HA
Q3YEC7	HA	HA
P57796	HA	HA
Q16612	HA	HA
Q96BP3	HA	HA
P82933	HA	HA
P29536	HA	HA
Q15040	HA	HA
Q5T7P3	HA	HA
P47989	HA	HA
P04732	HA	HA
P35232	HA	HA
Q8N6H7	HA	HA
Q9H4P4	HA	HA
O00299	HA	HA
P53370	HA	HA
P08238	HA	HA
Q00994	HA	HA
P82921	HA	HA
P05014	HA	HA
Q14331	HA	HA
A8MSI8	HA	HA
Q92686	HA	HA
P12110	HA	HA
Q13595	HA	HA
Q16630	HA	HA
P22670	HA	HA
Q14197	HA	HA
O00602	HA	HA
P31327	HA	HA
Q2NL82	HA	HA
Q9Y230	HA	HA
Q9NY56	HA	HA
Q8NDZ4	HA	HA
Q9P1F3	HA	HA
Q9UGP8	HA	HA
Q7Z6Z7	HA	HA
P55735	HA	HA
Q9H1X1	HA	HA
P61353	HA	HA
Q96DB5	HA	HA
Q9NYF8	HA	HA
Q8N9B4	HA	HA
O75449	HA	HA
Q7Z4G1	HA	HA
Q96S94	HA	HA
Q9UJ68	HA	HA
Q96B01	HA	HA
O14828	HA	HA
Q8TAI7	HA	HA
Q9NXU5	HA	HA
Q3LI59	HA	HA
P51116	HA	HA
P09105	HA	HA
P41218	HA	HA
Q05193	HA	HA
Q13247	HA	HA
O95989	HA	HA
P47874	HA	HA
P47914	HA	HA
P62306	HA	HA
P35542	HA	HA
O14925	HA	HA
P98179	HA	HA
Q6UN15	HA	HA
P05543	HA	HA
P61254	HA	HA
P68036	HA	HA
P60468	HA	HA
P46087	HA	HA
Q9P0M6	HA	HA
P23284	HA	HA
P62851	HA	HA
H0Y354	HA	HA
P22626	HA	HA
Q14160	HA	HA
A6NNT2	HA	HA
P58511	HA	HA
P0CE72	HA	HA
Q96A44	HA	HA
Q13151	HA	HA
Q6VUC0	HA	HA
Q9UBR2	HA	HA
P15311	HA	HA
Q9NYG5	HA	HA
O95409	HA	HA
O43818	HA	HA
P12236	HA	HA
O14908	HA	HA
Q9UGJ0	HA	HA
Q16527	HA	HA
P47985	HA	HA
Q9BVK6	HA	HA
O43374	HA	HA
Q5T6F0	HA	HA
P31946	HA	HA
Q96JB6	HA	HA
O60832	HA	HA
P51608	HA	HA
O15527	HA	HA
Q9NXV2	HA	HA
Q9Y6R9	HA	HA
P30613	HA	HA
Q16385	HA	HA
P13716	HA	HA
Q16778	HA	HA
Q9BXP5	HA	HA
Q96N16	HA	HA
P56381	HA	HA
Q9NVF7	HA	HA
O43174	HA	HA
Q9BXM0	HA	HA
P83859	HA	HA
Q71U36	HA	HA
Q96RJ6	HA	HA
Q9P1U0	HA	HA
A1L162	HA	HA
P82673	HA	HA
Q8TD86	HA	HA
P04118	HA	HA
Q5JRK9	HA	HA
Q9NQP4	HA	HA
P32745	HA	HA
Q6ZN17	HA	HA
Q8WUZ0	HA	HA
P30041	HA	HA
Q6L9T8	HA	HA
Q9UBL6	HA	HA
Q00266	HA	HA
P14415	HA	HA
P04899	HA	HA
P63218	HA	HA
Q9BRL6	HA	HA
Q9BYG7	HA	HA
Q8TD47	HA	HA
P83881	HA	HA
Q9Y603	HA	HA
Q9Y383	HA	HA
P55209	HA	HA
Q6GMV3	HA	HA
Q92882	HA	HA
P0DJ93	HA	HA
P46013	HA	HA
Q9BXJ1	HA	HA
Q9H628	HA	HA
O95229	HA	HA
P06493	HA	HA
Q8N1A0	HA	HA
Q13435	HA	HA
Q8NEA5	HA	HA
Q86SE5	HA	HA
Q96A26	HA	HA
Q9Y5B9	HA	HA
P51153	HA	HA
Q8N3Z3	HA	HA
P56705	HA	HA
Q5VUM1	HA	HA
P13010	HA	HA
Q9GZP4	HA	HA
Q9ULI2	HA	HA
P21291	HA	HA
P59190	HA	HA
Q93045	HA	HA
Q12769	HA	HA
Q9P0W2	HA	HA
P62807	HA	HA
Q7Z2K8	HA	HA
Q96KN9	HA	HA
Q96SB3	HA	HA
Q06547	HA	HA
P62753	HA	HA
Q14008	HA	HA
Q9H0T7	HA	HA
Q96G28	HA	HA
Q9NQS1	HA	HA
P08758	HA	HA
Q86VM9	HA	HA
Q15054	HA	HA
O75864	HA	HA
O14967	HA	HA
Q86WR7	HA	HA
Q9NVM6	HA	HA
Q96DA6	HA	HA
P63167	HA	HA
Q8TB03	HA	HA
Q86XP3	HA	HA
O76021	HA	HA
Q8TE04	HA	HA
Q13148	HA	HA
P35270	HA	HA
Q96BS2	HA	HA
P42684	HA	HA
Q96MW5	HA	HA
Q9BY07	HA	HA
Q9P291	HA	HA
Q8NEV1	HA	HA
Q86XH1	HA	HA
O15540	HA	HA
Q96I34	HA	HA
Q8WWA1	HA	HA
Q9Y3Q4	HA	HA
P55809	HA	HA
P62318	HA	HA
Q9BYX4	HA	HA
Q8N7H5	HA	HA
Q96T37	HA	HA
Q6IPR1	HA	HA
O14735	HA	HA
P78368	HA	HA
P60827	HA	HA
O14910	HA	HA
P20618	HA	HA
O95343	HA	HA
Q15014	HA	HA
Q8WXX5	HA	HA
O00562	HA	HA
Q9BQ67	HA	HA
O94906	HA	HA
Q49B96	HA	HA
P35527	HA	HA
Q9UBV8	HA	HA
P12081	HA	HA
Q8N8A6	HA	HA
O95816	HA	HA
Q9H0X6	HA	HA
Q86Y22	HA	HA
Q96FW1	HA	HA
P28066	HA	HA
P62879	HA	HA
P45378	HA	HA
P55273	HA	HA
Q96DX7	HA	HA
Q8N6N7	HA	HA
P05787	HA	HA
P51161	HA	HA
Q86XZ4	HA	HA
Q9P2K6	HA	HA
P10412	HA	HA
P25445	HA	HA
P25440	HA	HA
Q53GA4	HA	HA
P02746	HA	HA
Q9Y5P2	HA	HA
Q96QP1	HA	HA
O75306	HA	HA
Q9H305	HA	HA
Q12798	HA	HA
Q7Z2X7	HA	HA
P29373	HA	HA
Q9NQ79	HA	HA
P02795	HA	HA
Q9BV44	HA	HA
Q92575	HA	HA
Q9Y535	HA	HA
Q8NFC6	HA	HA
Q07817	HA	HA
Q8IYD1	HA	HA
Q01105	HA	HA
Q15022	HA	HA
P47755	HA	HA
Q9NRX6	HA	HA
P49006	HA	HA
P37108	HA	HA
Q9UL15	HA	HA
Q9H1E3	HA	HA
Q01831	HA	HA
Q96MD7	HA	HA
Q9H3R5	HA	HA
P26232	HA	HA
P02585	HA	HA
Q9Y3Z3	HA	HA
P54652	HA	HA
Q6YN16	HA	HA
Q9BXJ0	HA	HA
P54750	HA	HA
P63272	HA	HA
Q07955	HA	HA
Q9P1Y6	HA	HA
P24043	HA	HA
Q9C005	HA	HA
Q2TAP0	HA	HA
P98173	HA	HA
P17568	HA	HA
O43172	HA	HA
Q53RE8	HA	HA
P06746	HA	HA
Q14165	HA	HA
P55795	HA	HA
Q01995	HA	HA
P61224	HA	HA
P35606	HA	HA
Q02543	HA	HA
Q9BZM2	HA	HA
O75223	HA	HA
P09525	HA	HA
O60225	HA	HA
P21912	HA	HA
P14678	HA	HA
Q96LR7	HA	HA
P50552	HA	HA
Q13428	HA	HA
Q9NRW4	HA	HA
Q8WUJ0	HA	HA
Q8NEJ9	HA	HA
Q8IXQ4	HA	HA
Q8WYR4	HA	HA
Q9HA64	HA	HA
B3KS81	HA	HA
Q53S33	HA	HA
P61925	HA	HA
Q86V81	HA	HA
P48681	HA	HA
Q96KF2	HA	HA
Q13112	HA	HA
Q96NK8	HA	HA
O00303	HA	HA
O15042	HA	HA
Q15059	HA	HA
P54577	HA	HA
Q96IF1	HA	HA
Q9H5P4	HA	HA
A6NCL7	HA	HA
Q13451	HA	HA
Q8N5D0	HA	HA
Q8TA86	HA	HA
Q6PK04	HA	HA
Q8TF21	HA	HA
P78347	HA	HA
Q8N6T7	HA	HA
O60783	HA	HA
Q86W42	HA	HA
P53597	HA	HA
P55201	HA	HA
Q15327	HA	HA
Q9BWC9	HA	HA
Q03701	HA	HA
Q13868	HA	HA
Q15773	HA	HA
P63162	HA	HA
Q8WYJ6	HA	HA
Q8TE68	HA	HA
Q9Y6H1	HA	HA
O95926	HA	HA
P24534	HA	HA
Q9NZT2	HA	HA
Q5T2D3	HA	HA
P84095	HA	HA
Q9UG01	HA	HA
P49761	HA	HA
Q6UXN9	HA	HA
O14654	HA	HA
Q9UL51	HA	HA
P43686	HA	HA
Q02535	HA	HA
Q8N412	HA	HA
Q9BZ67	HA	HA
P06899	HA	HA
Q9NZJ9	HA	HA
P98175	HA	HA
Q8NHQ9	HA	HA
P52655	HA	HA
P19237	HA	HA
Q6P087	HA	HA
O14503	HA	HA
Q9Y4X5	HA	HA
Q6P4E1	HA	HA
Q9BYN0	HA	HA
Q9Y291	HA	HA
Q15185	HA	HA
P22528	HA	HA
Q5I0X4	HA	HA
Q9BW83	HA	HA
Q6PCT2	HA	HA
Q9UNM6	HA	HA
Q4LE39	HA	HA
P60709	HA	HA
P23510	HA	HA
Q8IWT0	HA	HA
Q02952	HA	HA
Q8WU43	HA	HA
O14713	HA	HA
P05198	HA	HA
Q9Y5V3	HA	HA
Q8N3J5	HA	HA
Q9BW62	HA	HA
P12872	HA	HA
Q9NW13	HA	HA
O43676	HA	HA
P02745	HA	HA
P07305	HA	HA
Q9Y221	HA	HA
P27482	HA	HA
Q9NPC8	HA	HA
Q9NRC8	HA	HA
P00488	HA	HA
P62280	HA	HA
H0YL14	HA	HA
P49458	HA	HA
P58215	HA	HA
Q9NVX2	HA	HA
Q15233	HA	HA
P07942	HA	HA
A0A075B759	HA	HA
P43487	HA	HA
Q9BUH6	HA	HA
P04843	HA	HA
P84085	HA	HA
P46100	HA	HA
P52179	HA	HA
Q96A32	HA	HA
Q96NT1	HA	HA
P51575	HA	HA
Q9ULJ7	HA	HA
P47813	HA	HA
O75956	HA	HA
A6ND36	HA	HA
A0PJX2	HA	HA
Q8WVJ9	HA	HA
P01730	HA	HA
Q86U38	HA	HA
P42773	HA	HA
P49588	HA	HA
P16402	HA	HA
Q13563	HA	HA
Q6UX04	HA	HA
Q9UBI6	HA	HA
P36578	HA	HA
Q7Z6K5	HA	HA
P84098	HA	HA
Q8IWE2	HA	HA
H0UI37	HA	HA
Q8N9M1	HA	HA
Q8IZP0	HA	HA
Q8WXF8	HA	HA
O60575	HA	HA
O00192	HA	HA
P31277	HA	HA
A6NEH6	HA	HA
Q9NZQ9	HA	HA
Q96EK5	HA	HA
Q8TC41	HA	HA
Q8NFU3	HA	HA
A6NHT5	HA	HA
Q9Y6N5	HA	HA
O60307	HA	HA
Q9P2W9	HA	HA
P28702	HA	HA
Q01469	HA	HA
P55317	HA	HA
Q5VUJ9	HA	HA
Q9NZW4	HA	HA
A8TX70	HA	HA
P55072	HA	HA
Q9HA47	HA	HA
P16157	HA	HA
Q14669	HA	HA
Q9P215	HA	HA
Q6P1M9	HA	HA
P16152	HA	HA
P05161	HA	HA
P61978	HA	HA
Q15370	HA	HA
Q8WVF2	HA	HA
O15195	HA	HA
O60884	HA	HA
Q9BR76	HA	HA
Q9NY65	HA	HA
Q70EK9	HA	HA
Q8WW18	HA	HA
A1IGU5	HA	HA
P19388	HA	HA
Q99102	HA	HA
A0JLT2	HA	HA
Q9Y6M4	HA	HA
P61962	HA	HA
O14957	HA	HA
Q5T2T1	HA	HA
Q9Y388	HA	HA
Q9BVA1	HA	HA
Q96HS1	HA	HA
Q9NQV8	HA	HA
Q5TA45	HA	HA
Q04917	HA	HA
Q9UBV2	HA	HA
P04264	HA	HA
P78537	HA	HA
Q96EY1	HA	HA
Q6QNY1	HA	HA
Q6ZUT6	HA	HA
Q6UWE3	HA	HA
D3DTV9	HA	HA
P0CG48	HA	HA
P40261	HA	HA
Q9NX00	HA	HA
Q9NRG4	HA	HA
Q16891	HA	HA
[truncated: 30,856 more rows]
