# Supplementary material for: Prediction of influenza A virus-human protein-protein interactions using XGBoost with continuous and discontinuous amino acids information
Source: PeerJ. 2025 Jan 30;13:e18863. doi: 10.7717/peerj.18863 (PMC11787804; doi:10.7717/peerj.18863)
Supplement: Supplemental Information 3 [file peerj-13-18863-s003.xlsx]

## Sheet: Sheet1
H_id
Q969G3
Q96GX2
Q6ZMM2
P61604
P23297
O43822
Q9H501
Q8TCD5
O14949
Q92922
P17174
P81534
Q7Z4W1
Q9Y2V7
Q9NVP1
O43617
Q01970
Q6FI13
Q13283
P61289
Q12756
Q16658
P55808
Q13895
P55884
Q8IWT1
O95347
Q8N5Z5
Q92748
O95817
Q00577
P01148
Q9BYQ5
P52209
Q92598
P26641
Q9BVM4
Q9BRP4
Q96KN1
Q9Y3I0
Q92629
O15553
Q86VB7
Q9NU02
A8MQ03
P07148
P80297
Q9BWG6
P14618
Q7RTU7
P12004
P01270
Q14764
Q14444
P09038
P48444
A6PVI3
Q96GI7
Q99962
Q9BWP8
P26885
Q86VF2
Q96BD6
Q0ZGT2
O60547
Q8IXQ3
O14776
O14994
P60510
P61204
Q5QNW6
Q15493
Q8TF09
Q9P243
P60983
P62166
P35080
Q6ZMN8
Q15004
O95619
Q8WUM0
Q8IUR0
Q99615
O00330
Q6IN84
P09629
Q8IYN2
Q56P42
P61296
Q9Y324
Q13523
Q99865
Q92688
Q8NHW3
P12035
Q8WUU5
P69905
O76038
Q9Y4L1
Q8WXG8
Q92997
Q13319
P41208
Q9H322
O95793
Q8TBB1
Q9ULB1
Q75WM6
O00548
O14979
O95847
Q5VYV7
P37198
O75475
A0A0U1RRK4
P53816
O60499
P02461
P48668
Q6PI98
P62995
P48788
Q99715
Q7Z2F6
P52434
P45985
Q5TCM9
P49321
Q16543
P09455
O00267
O95391
P28356
Q92896
P46821
Q9BY41
Q96S95
P40429
Q99909
Q9NQZ2
O00268
Q9NRX4
Q9H6W3
P02810
P41279
P46783
Q5T5S1
Q15349
Q92900
Q15170
Q6PKG0
Q14847
O43390
P62913
Q9C098
Q9NRX3
Q9BQ66
O75526
Q9BRJ6
Q16626
Q8NEG2
P63211
Q9H5X1
Q5MJ10
P23025
Q5T7P2
Q9NP95
Q92777
Q7L273
Q00610
O75487
P11413
Q86VQ3
P42771
Q9H1R3
P62072
Q5JUX0
O15523
P12109
P02008
Q9UM54
Q96G21
Q8NAA4
O15020
Q05707
Q9UK32
Q86T20
Q14117
Q9UQ35
Q5VZ52
P06454
P40425
Q8IV56
Q9Y536
Q53H12
Q9GZY4
P49840
O95782
Q9UBR1
O75525
P63151
Q9NQ89
O75348
H3BPM6
O00232
P09382
P35221
Q15651
Q9Y680
Q15056
O15117
Q9H7B2
Q9H9T3
Q9Y303
P46781
Q3SXZ7
P02458
Q6ZMQ8
Q16204
Q96MF7
P63261
Q6P1J9
Q6P2I7
P83916
P82970
Q5H9R7
P30154
O15066
Q8WYQ3
Q7L0Q8
Q6PD62
Q8NB37
O14561
Q8NAV2
Q13882
Q9NUV7
Q5JSH3
Q86UW2
P23528
Q8IZU1
A6NC42
Q96CB8
P0DJI9
Q14681
O95219
Q13627
P13861
Q15050
P52292
Q16799
Q8NFJ8
P53041
P11086
O15355
Q504U0
P18583
Q9H8M2
P07738
P36542
P23396
Q9Y543
Q63HQ0
Q96QC0
Q15746
Q02575
P60896
P18124
Q9H320
P31415
Q06587
Q5VTT5
Q9UN19
Q49A26
Q9C0B5
Q3LI58
P47224
Q9H2C1
Q8WTQ1
Q96AH0
P59282
P15421
Q8N4E4
Q9Y5N5
O43615
Q2TAL6
Q3ZCM7
P04280
A6NED2
P21796
Q01082
Q9Y4C8
Q5FWF7
O43399
Q9UHA4
O43543
Q01130
Q13765
Q9NQE9
Q9HAP6
Q9BR01
O00629
O75973
Q86VW2
P62910
Q14320
Q99571
P98171
Q7Z5K2
O96028
P45379
O60925
P00374
P60323
P08621
Q93077
Q9H147
Q9BQ39
P57053
Q8IUE6
A6NEL2
P14927
O95466
Q9Y3L5
O75175
Q9UBS4
Q9Y2D0
Q8TBB0
Q96JG8
P27635
O75190
Q5T5X7
Q9H078
Q5H9L2
Q86VY4
O00308
P68366
Q9Y6X0
Q5TCZ1
Q5MNZ6
P33764
Q9UFB7
Q15007
Q9H2G4
O00148
P02042
Q9Y4K0
P18615
Q9BT67
Q9BWW7
Q9P2J5
P42127
P01591
P61081
Q7Z5V6
P78348
A0A183
P67870
Q5TYM5
A0A096LP55
O00487
Q13263
Q5JXX7
P62316
P0C0S8
Q9P2R3
P01160
Q9P015
P78545
O94874
P24723
P63173
P68032
Q9H910
O75150
Q99848
Q7L014
Q4LDG9
Q14993
Q9Y600
P14649
Q15020
Q53EL6
O00481
Q15545
O75817
Q9NYY1
P05455
Q96LK0
Q93079
Q13685
Q99217
Q96D98
Q9BRX9
Q16890
O75828
O43865
P30793
Q6PGP7
P38117
Q8WUJ1
P27216
O95622
P62899
Q9ULE3
Q9H461
P11488
Q12934
P0C862
Q8N371
Q8N9W5
P01040
Q9Y576
Q6UX40
Q9Y4Y9
Q96EH3
Q9HDC9
P11498
Q96CM4
Q9BYD6
P51114
Q6ZV29
Q0PNE2
O15235
P82909
P15259
Q96HE8
Q7L311
Q00597
P25788
Q9BRU2
Q9BR39
O43707
Q8NE63
P52597
P16403
Q8NG41
Q9H336
P09651
Q01081
Q9Y247
Q00325
Q96A05
P09467
Q86UY6
Q96A57
Q96MP8
P00568
Q8TD35
P08865
O95715
Q6P5X5
Q5U5X0
Q96MN5
P04083
Q495X7
Q9P2T0
Q9NQG5
P00367
Q99963
Q07021
Q13200
P08754
Q09666
Q96D15
Q86Z23
O15034
Q96P70
P30101
P05156
Q66PJ3
Q9BUH8
Q8N257
Q96H35
Q7Z569
Q7Z3Z0
A7E2Y1
Q8WTS6
Q96NB3
O14633
Q6P161
B2RUZ4
Q8N841
Q14151
P41271
P20671
Q13242
P49406
Q8NBT0
P19367
Q4KMP7
O94964
P17096
C9J069
Q9P299
P61247
Q9NRC6
P36639
Q9Y6N6
Q7Z6I8
Q9BWT1
A8MTJ3
A0A087WWA1
P78536
P00709
P00558
Q6ZMW3
P08572
Q9Y2Q5
Q9BYE2
P32754
Q96AG4
Q9BTT0
Q8N9N8
Q5T752
Q13155
O75531
Q9BRK5
O75940
Q9UBC3
P05388
Q9Y3Q8
O75935
P12107
P78527
Q9HD42
Q96I13
P47897
Q9H9Q2
Q9HAB8
Q96L21
Q5HY64
Q9NRH2
Q9BWF3
Q5GH76
P68363
P14317
P11226
Q9Y4B5
Q9UBF6
Q9BQE3
P10916
P28070
O60645
Q9BSK4
Q8NCB2
Q00839
P00915
Q96B26
P25686
Q5EE01
P68104
A0A087WXM9
Q8N8J7
Q9UKD2
Q99879
P23588
P62875
Q6DN14
Q9BZX4
P35612
Q6EEV4
P46782
Q15554
Q6IBS0
Q86VF7
Q9UKS6
Q14657
Q9P2L0
Q15051
P30086
Q9UPM9
Q8TBF4
Q8WXF1
Q93088
Q9BUF5
P62937
O15182
Q96EY8
Q96HR3
P05937
P84243
P49368
Q9Y483
O95455
P55769
Q9UPT8
P47929
B3EWG3
Q9NZ56
O96013
Q8WVI0
Q6JVE9
Q8TBK6
P10155
Q6ZTZ1
P62701
O60704
O75688
P28562
A5D8V6
P30050
Q6UWP8
O43677
Q4ZIN3
Q9UGB7
Q53GS9
O43598
Q13588
P62269
P18825
O14775
Q9BSF8
Q0Z7S8
Q9Y2X3
Q16878
P52739
Q5TA81
Q99549
Q9Y2G4
O75909
O15525
Q8WXK4
O15213
P07384
Q8IY51
Q6P1M3
Q9HBB8
Q9H3G5
Q14554
A1YPR0
P09683
Q6P6B7
Q9NS73
Q8N6M8
P49763
Q9GZV1
P27694
Q969S3
Q99525
Q92478
P51970
Q9BW30
Q99439
O96015
Q6EEV6
Q9Y285
Q8N140
O95218
Q8N5P1
Q12905
Q8N6N2
Q6P3W2
Q96PY6
Q96LB4
Q8NHY5
P42768
Q9BXY4
Q99653
Q5KU26
O15269
Q99729
P22392
Q9BXJ4
Q9NS28
Q96CN5
Q8IUD6
Q99457
A2RU49
Q96F05
Q9NPQ8
P30085
Q9BZD6
O96004
P58294
Q6SPF0
P58753
Q5JTZ5
Q9H902
Q9H0R4
Q8WU10
Q9BUA6
Q9BY42
P62258
Q9UKJ3
Q9BTM1
Q9H0L4
Q5JSQ8
A8MT69
Q15485
P61163
Q4W5G0
Q9UQ80
Q15027
P07355
O95873
Q8N9C0
Q9Y2S6
Q6P582
Q70HW3
Q8WW22
P0DJI8
Q9Y224
Q8IZS6
Q08945
Q13185
Q5T200
P63104
Q9Y315
Q9P0M9
Q9BQC6
Q5TC84
Q9NX24
Q8N427
O75638
A6NJ08
O14950
Q15063
O00425
Q9Y675
P45973
Q9BVC4
Q9Y3A2
P49411
Q9Y3D5
P57055
O95257
Q8N442
Q8TAP4
Q9H115
Q6VMQ6
O43189
P05121
P23526
Q9BSH4
Q8NEG4
P31947
P23246
O60882
Q96DE5
Q5T013
Q03188
P62244
P11233
Q96A33
P49748
Q96FZ7
O15145
Q8NFZ5
O75947
P83876
Q9Y6A4
Q12837
Q8WUR7
P09543
Q9UQ10
Q9BV29
P20472
P62314
O60888
Q96L33
P09661
Q7Z406
Q96QH2
Q96PY5
Q9HAU5
A6NGE4
Q9HD15
Q5TBB1
Q96CF2
P49746
Q9NXW2
Q96SI1
Q9NZQ0
Q15599
Q9NYQ8
Q9Y284
Q6ZMI3
P11217
O95573
P02747
P09871
Q07654
Q96BR5
O75569
Q9BZ23
Q8IVT2
Q15560
O43896
Q14258
Q15287
Q8IYK2
A6NMA1
P52435
Q15833
Q06787
Q32MZ4
Q14974
Q15717
Q969V5
Q8N9V2
O00194
P26583
P05997
P05141
Q9NZR1
P07197
Q96IX5
P38159
Q01955
Q8NDF8
P08133
Q9UBT2
Q5SXM2
Q9Y3P9
Q9P2K5
Q15366
O75400
Q96PK6
Q9P2M1
Q7Z7B7
Q7Z7H5
P62820
O43639
Q92804
P52756
O75553
Q9NVT9
P0CW27
Q15208
P78330
P07996
Q3LI72
Q9UMD9
P82664
P14866
Q02880
Q9NZI6
P07437
Q96SB4
Q96P50
P19784
Q9Y5S9
O95825
P42766
Q9UBB5
O00294
Q96FV3
A6NF83
P0CG32
P49756
Q93062
P12235
Q9Y3D6
Q14324
Q9BRU9
P13646
Q68J44
P10636
P62854
P49207
Q9H1Z4
Q9BXK5
P60866
Q12800
Q9H1D9
Q96IZ0
Q14152
Q53LP3
Q9GZN8
O60841
Q92526
Q7Z5Y7
P43034
P08590
Q15269
Q9UKL6
Q9Y3Y2
Q96A70
Q96K21
Q9NR45
Q99442
P15313
P43405
Q8TCA0
A8MXD5
Q00872
Q8NBJ7
P27540
O43324
P08833
Q8NFW1
Q9Y5K8
Q00341
Q01546
P58546
Q7Z429
Q12830
Q9BQA1
P17936
Q8NHU0
P18085
P07237
Q9H246
Q99417
Q15084
Q9P2R7
Q8WUD4
Q6ZN18
O75037
Q9UIF7
P62987
P56182
P56279
Q9NXJ5
P49448
O15090
Q9NYB9
O95402
Q9Y265
P25789
Q9NX01
Q08AG7
P32418
P03956
Q99453
Q8TCB7
O43768
Q5T481
Q5VSR9
P62877
Q8WWF8
Q9H9B1
Q96MS3
Q8WVI7
Q02325
P33240
Q9C002
O15372
Q6UWT4
O43820
O60503
Q15046
P49918
Q0VAF6
Q9BYR4
O15370
Q9NUQ6
Q9H074
Q15542
P02533
Q05823
Q8TC84
P07900
A0PJW8
Q8IZP7
P78346
Q9UHP6
O94905
P83369
Q9H765
P52788
P60842
Q02978
Q5JTN6
O14926
Q96DC9
O60506
Q92838
O95167
P82650
P55055
P16220
P08708
Q99832
Q96PE5
P21333
Q02790
P27348
Q9UNX3
Q96IZ7
Q9H772
P24593
P13647
P08254
Q8IZC6
P62906
O75052
Q9P0J1
Q9P242
Q9Y2T3
Q96A72
Q2UY09
Q8N5C6
Q5BKY1
Q96QS6
Q9BZL4
Q9NWY4
O43395
Q7L775
P39060
Q14004
Q9BQ04
Q8WU39
Q86VZ2
O00401
Q99714
P82914
Q86XW9
P18858
Q3LI54
Q9BXA6
O14977
Q8N5W8
Q9Y657
O43747
Q99877
Q9NQM4
Q14028
Q9BY77
Q6NUK4
P16870
Q8WXE0
P04908
Q9HD47
Q9Y4F5
Q15005
P10114
P20700
P62805
Q96EF6
Q12931
P12268
Q9Y5P8
Q9Y421
Q9Y6M1
P02686
Q13823
Q9HAY2
P07766
Q07283
P20264
Q99218
Q7Z7F7
P31948
P20849
P30405
Q9Y4P3
Q5HYN5
Q9Y3E2
P08195
P55265
Q9BV20
Q5TAT6
P00918
Q8TDM0
P49959
P62873
Q8WWF1
Q3YBR2
P16520
P62714
Q86SG2
P62266
P42696
O75409
Q8IWX7
O00505
Q96BP2
P23919
P25815
O95848
P55075
P05387
O14904
Q9BUB7
P59780
O00470
O75152
Q71UM5
P25705
Q96NG3
Q6S545
P08123
Q14257
P08913
P16401
P30519
Q14318
P53420
Q9NWM8
Q96BZ8
Q9Y6Z7
Q702N8
Q96RP9
Q8N9T8
O15061
P11229
Q86SX6
P17987
P01189
Q96FA3
Q13371
P47756
Q9UFN0
Q9C010
Q9UPV7
Q14019
Q9H008
Q9BQG0
Q6UWS5
P35908
Q9NTI5
O75689
Q14315
Q9UHG0
Q96I25
Q5T9A4
Q6IAA8
Q14896
Q8IUH3
Q9UEW3
Q92665
P31689
P17980
Q9Y3B1
Q8NFW8
P61019
Q9UJU6
P23527
P61026
Q9C0J8
P78358
Q8TDN2
P43166
Q70IA8
Q96FK6
Q9GZT3
O43143
Q01449
P51858
O14602
P63267
Q562R1
Q9H4A6
Q8WYH8
P62750
Q9NY12
Q8NAA5
Q7Z6J9
A6NNE9
Q6UWM5
P04156
Q03828
P54922
Q7L0Y3
P57076
Q09028
O95834
Q15397
Q8NCR3
P08779
Q8NA70
P15248
P09430
Q8N983
Q9Y2L9
Q5TGZ0
Q9NU23
Q9H840
P81277
Q9HBH0
Q7Z7J9
Q9UJX6
Q9H0U4
Q9UHF5
P62857
Q86X29
Q9NY93
Q9BZL1
Q9Y6N9
O43866
Q9UGY1
Q12906
Q9Y6Q5
Q9UPN7
Q96CD0
Q8N7U7
A0A0U1RQF7
Q08752
P07199
P50914
O75494
P51911
Q99720
Q9H444
Q9Y281
A0A0A6YYL3
O60218
Q9Y3T9
Q9Y6S9
Q9H6H4
Q9UMX5
Q5T753
Q99933
Q7L7L0
P62081
Q8WUQ7
P63208
P17844
P62745
Q96E39
Q5JWF2
Q9UII2
Q9H2M3
Q14498
Q14204
Q9NR00
Q16695
O75937
P25800
Q8TDD1
P17677
O95395
P54296
P16949
O14744
P54136
P20073
Q96L03
Q08379
Q9BPZ2
O75496
Q86U28
P54821
P84090
P13232
Q9BQL6
Q99748
Q96P53
Q8IWZ3
Q6BAA4
Q9UL19
Q9BYN8
P30043
Q99733
P49407
Q9BX51
O00231
P00966
O75874
Q7L4I2
Q92541
P24522
Q5JQF8
P55008
O43583
A4D161
Q02388
P05165
Q9P1Z0
P78352
O96033
P52815
Q8WUB8
P07108
P09669
P35269
Q495B1
O15381
Q8WWM9
Q16384
Q9ULZ3
Q9UNP9
P25786
P13994
P25398
Q8NB90
P61513
P07492
Q5VTL8
Q96GN5
Q6NWY9
Q00653
Q96B54
O75369
Q9Y2W2
Q13794
Q8IY81
Q16186
P14625
Q8NE71
Q9P289
Q49AH0
Q14515
P35998
P0DMQ5
O75264
Q9BZI7
Q9UKK6
Q9UN86
Q9Y3C6
Q16363
P62917
Q8IXM2
Q9NP97
Q6IQ22
P08134
Q6PF06
O76031
O14933
P03923
Q96CT7
P17858
Q9Y3C5
Q9UG63
Q15637
Q96TC7
Q14088
Q8IVS2
Q8N1G4
P17480
A6NHN0
Q7Z5L4
P78362
P22694
Q52LJ0
Q00688
O75528
Q15696
Q02747
Q9UDY4
Q0P5N6
Q9H269
P39019
O15498
P69892
Q9P0U1
Q9Y3B4
P62195
P02545
Q9BQ48
Q8N6V4
Q06945
H3BQW9
Q9BQG2
Q9Y314
Q9Y4A0
Q5C9Z4
Q9BZ81
Q9BZZ5
Q9Y5H9
Q01844
Q8N7S2
Q8NHQ1
Q71UI9
O43790
P62888
Q5T8P6
Q7L8J4
P53567
Q8TB05
P82979
Q92522
Q92841
P25205
Q9UKB3
P42167
P0CG47
Q2TB90
Q8IZL8
P07910
Q9BQ13
A0A0B4J2F0
Q9BXJ5
Q13813
Q96A59
Q9BZG1
Q9NRP2
Q16777
Q9BQA9
O15056
Q01518
Q9Y3C1
P11801
Q9NQ34
Q96IK1
Q96G74
P60763
Q9Y295
Q96HY6
O15126
Q9BXQ6
Q08170
P09001
Q9NQC1
P23434
O95968
Q9BU68
P32969
P42857
Q96EL3
P27816
P61326
Q5T754
Q9BQ15
Q96J02
A6NGY3
O75533
Q9BZE4
P14923
P23497
P39748
Q8IWY4
Q9Y692
Q8WXS5
P42677
Q96BX8
Q969Q5
Q9BXL6
O94788
P04792
C9J202
P57738
P42025
Q9NTK5
Q6V0I7
Q5T751
Q86TM6
P42285
Q7Z6M4
P06733
O00339
A8MTZ0
P10109
Q6DKI1
Q6P2M8
Q9NTQ9
Q9NRH1
Q8N163
Q96EY7
O95932
Q9H267
Q96K17
O14625
P07451
Q9C0G0
Q99856
Q9UBK9
Q9H5Q4
P56378
Q14390
Q9NQ29
P09471
P60981
P61457
P15090
O00264
Q8NBS9
P09769
P48023
Q03692
P23763
O95433
O15318
P16989
Q9H1J1
Q8N9Z2
Q9UBI9
Q9Y3T6
Q9NWH9
Q96P44
P30048
P56706
Q6NXT6
A6NKN8
Q9BR61
Q9C099
P62249
Q9Y2B9
Q9NUI1
Q5VTH9
P11142
Q86V59
Q86XN8
O75558
Q8TD31
Q8N4Q0
Q14697
P19012
Q3ZCQ3
P62487
Q15907
O60234
O43521
Q9GZV4
Q9BRX8
O60542
Q13516
Q8N328
Q9BRD0
P29692
Q8IWS0
Q02539
Q9NWU2
Q3YEC7
P57796
Q16612
Q96BP3
P82933
P29536
Q15040
Q5T7P3
P47989
P04732
P35232
Q8N6H7
Q9H4P4
O00299
P53370
P08238
Q00994
P82921
P05014
Q14331
A8MSI8
Q92686
P12110
Q13595
Q16630
P22670
Q14197
O00602
P31327
Q2NL82
Q9Y230
Q9NY56
Q8NDZ4
Q9P1F3
Q9UGP8
Q7Z6Z7
P55735
Q9H1X1
P61353
Q96DB5
Q9NYF8
Q8N9B4
O75449
Q7Z4G1
Q96S94
Q9UJ68
Q96B01
O14828
Q8TAI7
Q9NXU5
Q3LI59
P51116
P09105
P41218
Q05193
Q13247
O95989
P47874
P47914
P62306
P35542
O14925
P98179
Q6UN15
P05543
P61254
P68036
P60468
P46087
Q9P0M6
P23284
P62851
H0Y354
P22626
Q14160
A6NNT2
P58511
P0CE72
Q96A44
Q13151
Q6VUC0
Q9UBR2
P15311
Q9NYG5
O95409
O43818
P12236
O14908
Q9UGJ0
Q16527
P47985
Q9BVK6
O43374
Q5T6F0
P31946
Q96JB6
O60832
P51608
O15527
Q9NXV2
Q9Y6R9
P30613
Q16385
P13716
Q16778
Q9BXP5
Q96N16
P56381
Q9NVF7
O43174
Q9BXM0
P83859
Q71U36
Q96RJ6
Q9P1U0
A1L162
P82673
Q8TD86
P04118
Q5JRK9
Q9NQP4
P32745
Q6ZN17
Q8WUZ0
P30041
Q6L9T8
Q9UBL6
Q00266
P14415
P04899
P63218
Q9BRL6
Q9BYG7
Q8TD47
P83881
Q9Y603
Q9Y383
P55209
Q6GMV3
Q92882
P0DJ93
P46013
Q9BXJ1
Q9H628
O95229
P06493
Q8N1A0
Q13435
Q8NEA5
Q86SE5
Q96A26
Q9Y5B9
P51153
Q8N3Z3
P56705
Q5VUM1
P13010
Q9GZP4
Q9ULI2
P21291
P59190
Q93045
Q12769
Q9P0W2
P62807
Q7Z2K8
Q96KN9
Q96SB3
Q06547
P62753
Q14008
Q9H0T7
Q96G28
Q9NQS1
P08758
Q86VM9
Q15054
O75864
O14967
Q86WR7
Q9NVM6
Q96DA6
P63167
Q8TB03
Q86XP3
O76021
Q8TE04
Q13148
P35270
Q96BS2
P42684
Q96MW5
Q9BY07
Q9P291
Q8NEV1
Q86XH1
O15540
Q96I34
Q8WWA1
Q9Y3Q4
P55809
P62318
Q9BYX4
Q8N7H5
Q96T37
Q6IPR1
O14735
P78368
P60827
O14910
P20618
O95343
Q15014
Q8WXX5
O00562
Q9BQ67
O94906
Q49B96
P35527
Q9UBV8
P12081
Q8N8A6
O95816
Q9H0X6
Q86Y22
Q96FW1
P28066
P62879
P45378
P55273
Q96DX7
Q8N6N7
P05787
P51161
Q86XZ4
Q9P2K6
P10412
P25445
P25440
Q53GA4
P02746
Q9Y5P2
Q96QP1
O75306
Q9H305
Q12798
Q7Z2X7
P29373
Q9NQ79
P02795
Q9BV44
Q92575
Q9Y535
Q8NFC6
Q07817
Q8IYD1
Q01105
Q15022
P47755
Q9NRX6
P49006
P37108
Q9UL15
Q9H1E3
Q01831
Q96MD7
Q9H3R5
P26232
P02585
Q9Y3Z3
P54652
Q6YN16
Q9BXJ0
P54750
P63272
Q07955
Q9P1Y6
P24043
Q9C005
Q2TAP0
P98173
P17568
O43172
Q53RE8
P06746
Q14165
P55795
Q01995
P61224
P35606
Q02543
Q9BZM2
O75223
P09525
O60225
P21912
P14678
Q96LR7
P50552
Q13428
Q9NRW4
Q8WUJ0
Q8NEJ9
Q8IXQ4
Q8WYR4
Q9HA64
B3KS81
Q53S33
P61925
Q86V81
P48681
Q96KF2
Q13112
Q96NK8
O00303
O15042
Q15059
P54577
Q96IF1
Q9H5P4
A6NCL7
Q13451
Q8N5D0
Q8TA86
Q6PK04
Q8TF21
P78347
Q8N6T7
O60783
Q86W42
P53597
P55201
Q15327
Q9BWC9
Q03701
Q13868
Q15773
P63162
Q8WYJ6
Q8TE68
Q9Y6H1
O95926
P24534
Q9NZT2
Q5T2D3
P84095
Q9UG01
P49761
Q6UXN9
O14654
Q9UL51
P43686
Q02535
Q8N412
Q9BZ67
P06899
Q9NZJ9
P98175
Q8NHQ9
P52655
P19237
Q6P087
O14503
Q9Y4X5
Q6P4E1
Q9BYN0
Q9Y291
Q15185
P22528
Q5I0X4
Q9BW83
Q6PCT2
Q9UNM6
Q4LE39
P60709
P23510
Q8IWT0
Q02952
Q8WU43
O14713
P05198
Q9Y5V3
Q8N3J5
Q9BW62
P12872
Q9NW13
O43676
P02745
P07305
Q9Y221
P27482
Q9NPC8
Q9NRC8
P00488
P62280
H0YL14
P49458
P58215
Q9NVX2
Q15233
P07942
A0A075B759
P43487
Q9BUH6
P04843
P84085
P46100
P52179
Q96A32
Q96NT1
P51575
Q9ULJ7
P47813
O75956
A6ND36
A0PJX2
Q8WVJ9
P01730
Q86U38
P42773
P49588
P16402
Q13563
Q6UX04
Q9UBI6
P36578
Q7Z6K5
P84098
Q8IWE2
H0UI37
Q8N9M1
Q8IZP0
Q8WXF8
O60575
O00192
P31277
A6NEH6
Q9NZQ9
Q96EK5
Q8TC41
Q8NFU3
A6NHT5
Q9Y6N5
O60307
Q9P2W9
P28702
Q01469
P55317
Q5VUJ9
Q9NZW4
A8TX70
P55072
Q9HA47
P16157
Q14669
Q9P215
Q6P1M9
P16152
P05161
P61978
Q15370
Q8WVF2
O15195
O60884
Q9BR76
Q9NY65
Q70EK9
Q8WW18
A1IGU5
P19388
Q99102
A0JLT2
Q9Y6M4
P61962
O14957
Q5T2T1
Q9Y388
Q9BVA1
Q96HS1
Q9NQV8
Q5TA45
Q04917
Q9UBV2
P04264
P78537
Q96EY1
Q6QNY1
Q6ZUT6
Q6UWE3
D3DTV9
P0CG48
P40261
Q9NX00
Q9NRG4
Q16891
[truncated: 996 more rows]
