# Supplementary material for: Prediction of influenza A virus-human protein-protein interactions using XGBoost with continuous and discontinuous amino acids information
Source: PeerJ. 2025 Jan 30;13:e18863. doi: 10.7717/peerj.18863 (PMC11787804; doi:10.7717/peerj.18863)
Supplement: Supplemental Information 4 [file peerj-13-18863-s004.xlsx]

## Sheet: Sheet1
Symbol	Uniprot	Degree	Display Name
RPS27A	P62979	131	RPS27A
RPS6	P62753	114	RPS6
RPS9	P46781	110	RPS9
RPS14	P62263	110	RPS14
RPS7	P62081	109	RPS7
RPS18	P62269	102	RPS18
RPS13	P62277	99	RPS13
RPS23	P62266	98	RPS23
RPSA	P08865	98	RPSA
RPS5	P46782	98	RPS5
UBA52	P62987	97	UBA52
RPS8	P62241	96	RPS8
RPS15	P62841	96	RPS15
RPS29	P62273	96	RPS29
RPS28	P62857	96	RPS28
RPS11	P62280	96	RPS11
RPS19	P39019	95	RPS19
RPS3A	P61247	95	RPS3A
RPS21	P63220	95	RPS21
RPS4X	P62701	95	RPS4X
RPS24	P62847	95	RPS24
RPS16	P62249	95	RPS16
RPS26	P62854	95	RPS26
RPS12	P25398	94	RPS12
RPS17	P08708	94	RPS17
RACK1	P63244	94	GNB2L1
RPS25	P62851	94	RPS25
RPS2	P15880	94	RPS2
RPS20	P60866	94	RPS20
RPS15A	P62244	94	RPS15A
RPS27	P42677	92	RPS27
RPS10	P46783	91	RPS10
RPL23	P62829	91	RPL23
RPL18	Q07020	88	RPL18
RPL30	P62888	88	RPL30
RPS3	P23396	88	RPS3
RPL8	P62917	88	RPL8
RPL10A	P62906	87	RPL10A
RPL18A	Q02543	87	RPL18A
RPL13A	P40429	87	RPL13A
RPL19	P84098	86	RPL19
RPL24	P83731	86	RPL24
RPL36	Q9Y3U8	86	RPL36
RPL5	P46777	86	RPL5
RPL27A	P46776	86	RPL27A
RPL38	P63173	86	RPL38
RPL32	P62910	86	RPL32
RPL7A	P62424	86	RPL7A
RPL31	P62899	86	RPL31
RPL4	P36578	85	RPL4
RPL39	P62891	85	RPL39
RPL23A	P62750	85	RPL23A
RPL6	Q02878	85	RPL6
RPL11	P62913	85	RPL11
RPL13	P26373	84	RPL13
RPL37A	P61513	84	RPL37A
RPL3	P39023	84	RPL3
RPL35	P42766	84	RPL35
RPL22	P35268	83	RPL22
RPL7	P18124	83	RPL7
RPL27	P61353	83	RPL27
RPL21	P46778	83	RPL21
RPL9	P32969	83	RPL9
RPL15	P61313	83	RPL15
RPL29	P47914	82	RPL29
RPL35A	P18077	82	RPL35A
RPL12	P30050	82	RPL12
RPL34	P49207	81	RPL34
RPL36A	P83881	81	RPL36A
RPL17	P18621	80	RPL17
RPLP2	P05387	80	RPLP2
RPL14	P50914	80	RPL14
RPL26	P61254	80	RPL26
RPLP0	P05388	79	RPLP0
RPL28	P46779	79	RPL28
RPLP1	P05386	78	RPLP1
RPL10L	Q96L21	78	RPL10L
EEF2	P13639	78	EEF2
RPL10	P27635	78	RPL10
SNRPD3	P62318	62	SNRPD3
SNRPD2	P62316	62	SNRPD2
SNRPB	P14678	59	SNRPB
SNRPD1	P62314	59	SNRPD1
SNRPF	P62306	58	SNRPF
EIF5B	O60841	55	EIF5B
RPS27L	Q71UM5	53	RPS27L
SNU13	P55769	53	NHP2L1
BYSL	Q13895	47	BYSL
SF3B1	O75533	47	SF3B1
SNRPA1	P09661	47	SNRPA1
SNRPB2	P08579	46	SNRPB2
PRPF31	Q8WWY3	44	PRPF31
EIF3A	Q14152	42	EIF3A
SF3B2	Q13435	42	SF3B2
SF3B4	Q15427	40	SF3B4
EIF2S1	P05198	40	EIF2S1
EIF1AX	P47813	39	EIF1AX
SRRM2	Q9UQ35	39	SRRM2
MRPS6	P82932	38	MRPS6
EIF3B	P55884	38	EIF3B
MRPS15	P82914	37	MRPS15
PNO1	Q9NRX1	37	PNO1
RSL24D1	Q9UHA3	37	RSL24D1
MRPS9	P82933	37	MRPS9
EIF3H	O15372	36	EIF3H
MRPS14	O60783	36	MRPS14
EIF3F	O00303	36	EIF3F
RIOK2	Q9BVS4	36	RIOK2
PRPF6	O94906	36	PRPF6
LSM4	Q9Y4Z0	36	LSM4
TSR1	Q2NL82	36	TSR1
LSM3	P62310	35	LSM3
MAGOHB	Q96A72	35	MAGOHB
HBA1	P69905	35	HBA1
PA2G4	Q9UQ80	35	PA2G4
HBA2	P69905	35	HBA2
HSP90AA1	P07900	35	HSP90AA1
DAP3	P51398	35	DAP3
BUD13	Q9BRD0	34	BUD13
MRPS10	P82664	34	MRPS10
DHX16	O60231	34	DHX16
RIOK1	Q9BRS2	34	RIOK1
NOB1	Q9ULX3	34	NOB1
MRPL11	Q9Y3B7	34	MRPL11
RBMX2	Q9Y388	34	RBMX2
LSM6	P62312	34	LSM6
MRPL41	Q8IXM3	33	MRPL41
SRC	P12931	33	SRC
MRPL43	Q8N983	33	MRPL43
PRPF3	O43395	33	PRPF3
PRPF19	Q9UMS4	33	PRPF19
SNRNP40	Q96DI7	33	SNRNP40
PRPF4	O43172	33	PRPF4
LSM5	Q9Y4Y9	33	LSM5
MRPS12	O15235	33	MRPS12
TXNL4A	P83876	33	TXNL4A
PSMD14	O00487	32	PSMD14
MRPL15	Q9P015	32	MRPL15
MRPL3	P09001	32	MRPL3
PSMD4	P55036	32	PSMD4
CWC27	Q6UX04	32	CWC27
MRPL19	P49406	32	MRPL19
MRPS18C	Q9Y3D5	32	MRPS18C
MRPL49	Q13405	31	MRPL49
MRPS35	P82673	31	MRPS35
MRPL17	Q9NRX2	31	MRPL17
PSMC4	P43686	31	PSMC4
MRPL27	Q9P0M9	31	MRPL27
UBC	P0CG48	31	UBC
MFAP1	P55081	31	MFAP1
MRPL44	Q9H9J2	30	MRPL44
RNF113A	O15541	30	RNF113A
NOP58	Q9Y2X3	30	NOP58
PSMD3	O43242	30	PSMD3
RPL26L1	Q9UNX3	30	RPL26L1
PSMD2	Q13200	30	PSMD2
GTPBP4	Q9BZE4	30	GTPBP4
PSMC2	P35998	30	PSMC2
IK	Q13123	29	IK
PSMC1	P62191	29	PSMC1
PRPF38A	Q8NAV1	29	PRPF38A
MRPS11	P82912	29	MRPS11
PSMB2	P49721	29	PSMB2
PSMD12	O00232	29	PSMD12
PSMA4	P25789	29	PSMA4
ADRM1	Q16186	28	ADRM1
MRPL34	Q9BQ48	28	MRPL34
PSMD1	Q99460	28	PSMD1
MRPL58	Q14197	28	ICT1
FBL	P22087	28	FBL
PSMD11	O00231	28	PSMD11
PSMB1	P20618	28	PSMB1
PSMA5	P28066	27	PSMA5
PSMC5	P62195	27	PSMC5
PSMB4	P28070	27	PSMB4
PSMA3	P25788	27	PSMA3
RRP9	O43818	27	RRP9
PSMC3	P17980	27	PSMC3
PSMC6	P62333	27	PSMC6
PSMA1	P25786	27	PSMA1
MRPL38	Q96DV4	26	MRPL38
DHX9	Q08211	26	DHX9
PSMD6	Q15008	26	PSMD6
PSMD7	P51665	26	PSMD7
SNW1	Q13573	25	SNW1
XAB2	Q9HCS7	25	XAB2
MRPL54	Q6P161	25	MRPL54
H4C9	P62805	25	HIST1H4F
NOP56	O00567	25	NOP56
CWC15	Q9P013	25	CWC15
PSMD13	Q9UNM6	25	PSMD13
EEF1A1	P68104	25	EEF1A1
CRNKL1	Q9BZJ0	24	CRNKL1
GNB1	P62873	24	GNB1
PTGES3	Q15185	24	PTGES3
IMP4	Q96G21	23	IMP4
MRPL23	Q16540	23	RPL23L
UBB	P0CG47	23	UBB
MRPL12	P52815	23	MRPL12
PDCD11	Q14690	22	PDCD11
WDR3	Q9UNX4	22	WDR3
UTP6	Q9NYH9	22	UTP6
POLR2E	P19388	22	POLR2E
ACTA1	P68133	22	ACTA1
UTP4	Q969X6	22	CIRH1A
UTP3	Q9NQZ2	21	UTP3
NOP14	P78316	21	NOP14
ABCF1	Q8NE71	21	ABCF1
FCF1	Q9Y324	21	FCF1
SNRPN	P63162	21	SNRPN
GTF2F1	P35269	21	GTF2F1
WDR46	O15213	21	WDR46
POLR2L	P62875	21	POLR2L
MRPL55	Q7Z7F7	21	MRPL55
MRPL10	Q7Z7H8	21	MRPL10
MRPS22	P82650	20	MRPS22
MRPS33	Q9Y291	20	MRPS33
GTF2A1	P52655	20	GTF2A1
MRPS21	P82921	20	MRPS21
AURKAIP1	Q9NWT8	19	AURKAIP1
MRPS26	Q9BYN8	19	MRPS26
UTP11	Q9Y3A2	19	UTP11L
RBBP4	Q09028	19	RBBP4
GNL2	Q13823	19	GNL2
MRPS34	P82930	19	MRPS34
MRPS31	Q92665	19	MRPS31
MRPL53	Q96EL3	19	MRPL53
PTCD3	Q96EY7	19	PTCD3
CHCHD1	Q96BP2	19	CHCHD1
STIP1	P31948	19	STIP1
NDUFAB1	O14561	19	NDUFAB1
MRPL57	Q9BQC6	19	MRPL57
MRPS25	P82663	19	MRPS25
MRPL18	Q9H0U6	19	MRPL18
LAMB1	P07942	18	LAMB1
POLR2D	O15514	18	POLR2D
RBM25	P49756	18	RBM25
HSPA4	P34932	18	HSPA4
SNRNP70	P08621	18	SNRNP70
USP39	Q53GS9	18	USP39
PSMD10	O75832	18	PSMD10
DDX23	Q9BUQ8	18	DDX23
POLR2G	P62487	18	POLR2G
SF3B6	Q9Y3B4	17	SF3B6
DHX15	O43143	17	DHX15
POLR2C	P19387	17	POLR2C
NDUFB7	P17568	17	NDUFB7
POLR2J	P52435	17	POLR2J
TAF4	O00268	17	TAF4
PSMD9	O00233	17	PSMD9
NDUFS5	O43920	17	NDUFS5
PPIE	Q9UNP9	17	PPIE
SYF2	O95926	17	SYF2
NDUFS7	O75251	17	NDUFS7
CENPA	P49450	17	CENPA
GNGT1	P63211	16	GNGT1
TAF7	Q15545	16	TAF7
SLU7	O95391	16	SLU7
HNRNPD	Q14103	16	HNRNPD
RBBP5	Q15291	16	RBBP5
NDUFA8	P51970	16	NDUFA8
PRMT5	O14744	16	PRMT5
PPIL1	Q9Y3C6	16	PPIL1
RUVBL1	Q9Y265	16	RUVBL1
HSPA8	P11142	16	HSPA8
H3-4	Q16695	16	HIST3H3
RBX1	P62877	16	RBX1
MRPL1	Q9BYD6	15	MRPL1
H3-3B	P84243	15	H3F3B
EIF4G1	Q04637	15	EIF4G1
DKC1	O60832	15	DKC1
EIF4A3	P38919	15	EIF4A3
NGDN	Q8NEJ9	15	NGDN
SUPT5H	O00267	15	SUPT5H
BTF3	P20290	15	BTF3
ACTB	P60709	15	ACTB
SNRPA	P09012	15	SNRPA
SMARCA4	P51532	15	SMARCA4
SUPT16H	Q9Y5B9	15	SUPT16H
NDUFB3	O43676	14	NDUFB3
GRB2	P62993	14	GRB2
RPN1	P04843	14	RPN1
NDUFS3	O75489	14	NDUFS3
GTF2A2	P52657	14	GTF2A2
YBX1	P67809	14	YBX1
ATP6V1D	Q9Y5K8	14	ATP6V1D
H3C10	P68431	14	HIST1H3J
ATP6V1H	Q9UI12	14	ATP6V1H
NDUFS2	O75306	14	NDUFS2
NDUFC1	O43677	13	NDUFC1
CTTN	Q14247	13	CTTN
RUVBL2	Q9Y230	13	RUVBL2
RTF1	Q92541	13	RTF1
ND6	P03923	13	MT-ND6
NDUFA1	O15239	13	NDUFA1
CTR9	Q6PD62	13	CTR9
UPF1	Q92900	13	UPF1
NDUFA3	O95167	13	NDUFA3
NDUFB11	Q9NX14	13	NDUFB11
PPP1CA	P62136	13	PPP1CA
PSME3	P61289	13	PSME3
UQCRC2	P22695	13	UQCRC2
PWP2	Q15269	13	PWP2
PAF1	Q8N7H5	13	PAF1
NDUFB2	O95178	13	NDUFB2
RBBP7	Q16576	13	RBBP7
EIF4A1	P60842	13	EIF4A1
POLR2H	P52434	13	POLR2H
WDR77	Q9BQA1	13	WDR77
SFN	P31947	13	SFN
HNRNPK	P61978	13	HNRNPK
CDC37	Q16543	13	CDC37
H2BC11	P06899	13	HIST1H2BJ
PPP5C	P53041	13	PPP5C
EZR	P15311	13	EZR
ZRSR2	Q15696	12	ZRSR2
SMARCC1	Q92922	12	SMARCC1
GTF2F2	P13984	12	GTF2F2
PPP2CA	P67775	12	PPP2CA
CHRM1	P11229	12	CHRM1
SMARCC2	Q8TAQ2	12	SMARCC2
HSP90AB1	P08238	12	HSP90AB1
YWHAZ	P63104	12	YWHAZ
WDR82	Q6UXN9	12	WDR82
PELP1	Q8IZL8	12	PELP1
HNRNPA1	P09651	12	HNRNPA1
CCT5	P48643	12	CCT5
PPP2CB	P62714	12	PPP2CB
SUPT4H1	P63272	12	SUPT4H1
PCNA	P12004	12	PCNA
PPP2R1A	P30153	12	PPP2R1A
SMARCE1	Q969G3	12	SMARCE1
HMGB1	P09429	12	HMGB1
PPP1CC	P36873	11	PPP1CC
CCT3	P49368	11	CCT3
CCT8	P50990	11	CCT8
PRKACB	P22694	11	PRKACB
CCT4	P50991	11	CCT4
PRPF40B	Q6NWY9	11	PRPF40B
NOP10	Q9NPE3	11	NOP10
PSME1	Q06323	11	PSME1
PAK4	O96013	11	PAK4
TCP1	P17987	11	TCP1
YWHAE	P62258	11	YWHAE
C17orf49	Q8IXM2	11	C17orf49
SRSF1	Q07955	11	SRSF1
CDC73	Q6P1J9	11	CDC73
SKP1	P63208	11	SKP1
CCT7	Q99832	11	CCT7
UQCRB	P14927	10	UQCRB
UQCRQ	O14949	10	UQCRQ
U2AF2	P26368	10	U2AF2
HSPA1A	P0DMV8	10	HSPA1A
PPP3R1	P63098	10	PPP3R1
PRKAR2A	P13861	10	PRKAR2A
RBM8A	Q9Y5S9	10	RBM8A
CCT6A	P40227	10	CCT6A
EPRS1	P07814	10	EPRS
MRPS36	P82909	10	MRPS36
ARRB1	P49407	10	ARRB1
HNRNPH1	P31943	10	HNRNPH1
INO80C	Q6PI98	10	INO80C
UQCRFS1	P47985	10	UQCRFS1
WASL	O00401	10	WASL
PABPC1	P11940	10	PABPC1
PPP2R2A	P63151	10	PPP2R2A
RING1	Q06587	10	RING1
PES1	O00541	10	PES1
PPP1CB	P62140	10	PPP1CB
PIK3R1	P27986	10	PIK3R1
NELFE	P18615	10	NELFE
DDX46	Q7L014	10	DDX46
SYK	P43405	10	SYK
YWHAH	Q04917	9	YWHAH
SERBP1	Q8NC51	9	SERBP1
LAS1L	Q9Y4W2	9	LAS1L
H3C14	Q71DI3	9	HIST2H3D
NEDD8	Q15843	9	NEDD8
EBNA1BP2	Q99848	9	EBNA1BP2
ANAPC2	Q9UJX6	9	ANAPC2
LAMA2	P24043	9	LAMA2
RSL1D1	O76021	9	RSL1D1
UBE2S	Q16763	9	UBE2S
TUBA1A	Q71U36	9	TUBA1A
SLC9A3R1	O14745	9	SLC9A3R1
RNPS1	Q15287	9	RNPS1
HNRNPF	P52597	9	HNRNPF
YWHAG	P61981	9	YWHAG
ACTN1	P12814	9	ACTN1
YWHAB	P31946	9	YWHAB
LAMC3	Q9Y6N6	9	LAMC3
DYNC1H1	Q14204	9	DYNC1H1
PPP1R9B	Q96SB3	9	PPP1R9B
YWHAQ	P27348	9	YWHAQ
LAMA4	Q16363	9	LAMA4
GAR1	Q9NY12	8	GAR1
PRKAR1B	P31321	8	PRKAR1B
EIF4B	P23588	8	EIF4B
SSRP1	Q08945	8	SSRP1
AP2A1	O95782	8	AP2A1
ATP5F1A	P25705	8	ATP5A1
DDX5	P17844	8	DDX5
H2AC4	P04908	8	HIST1H2AE
ERH	P84090	8	ERH
ATP5ME	P56385	8	ATP5I
ATP5F1C	P36542	8	ATP5C1
NOP2	P46087	8	NOP2
TAF5	Q15542	8	TAF5
ATP5PD	O75947	8	ATP5H
POLR3H	Q9Y535	8	POLR3H
NHP2	Q9NX24	8	NHP2
KPNA1	P52294	8	KPNA1
EIF4A2	Q14240	8	EIF4A2
ATP5PO	P48047	8	ATP5O
ATP5MF	P56134	8	ATP5J2
BOP1	Q14137	8	BOP1
VCL	P18206	8	VCL
ATP5F1E	P56381	8	ATP5E
HNRNPA0	Q13151	8	HNRNPA0
KPNB1	Q14974	8	KPNB1
SPTAN1	Q13813	8	SPTAN1
MAGOH	P61326	8	MAGOH
TAF10	Q12962	8	TAF10
PRKAR1A	P10644	8	PRKAR1A
ILK	Q13418	8	ILK
CLNS1A	P54105	8	CLNS1A
ZYX	Q15942	8	ZYX
